# Supplementary material for: Synthesis and discovery of 18β-glycyrrhetinic acid derivatives inhibiting cancer stem cell properties in ovarian cancer cells
Source: PubMed Central journal article supplement — RSC Adv. 2019 Aug 30;9(47):27294–304. doi: 10.1039/c9ra04961d (PMC9070660; doi:10.1039/c9ra04961d), 2019-08-30

# Supporting Information

## Synthesis and discovery of 18 $\beta$ -glycyrrhetic acid derivatives inhibiting cancer stem cell properties in ovarian cancer cells

XiaojingLi,<sup>\*ab</sup> YihuaLiu,<sup>c</sup> Na Wang,<sup>a</sup> YuyuLiu,<sup>d</sup> Shuai Wang,<sup>a</sup> HongminWang,<sup>a</sup> Aihua Li<sup>e</sup> and Shaoda Ren<sup>\*c</sup>

<sup>a</sup>Laboratory of Drug Discovery and Design, School of Pharmacy, Liaocheng University, Liaocheng 252000, China. E-mail: [lixiaojing@lcu.edu.cn](mailto:lixiaojing@lcu.edu.cn)

<sup>b</sup>Department of Medicinal Chemistry, Key Laboratory of Chemical Biology (Ministry of Education), School of Pharmacy, Shandong University, Jinan 250012, China.

<sup>c</sup>Central Laboratory, Liaocheng People's Hospital, Liaocheng 252000, China. E-mail: [zslrsd@163.com](mailto:zslrsd@163.com)

<sup>d</sup>Shandong Qidu Pharmaceutical Co., Ltd., Zibo 255400, China.

<sup>e</sup>Department of Obstetrics and Gynecology, Liaocheng People's Hospital, Liaocheng 252000, China.

### Table of Contents

|                                                           |    |
|-----------------------------------------------------------|----|
| 1. Purity of the target compounds 4a-4i and 7a-7i.....    | 2  |
| 2. NMR data of the target compounds 4a-4i and 7a-7i ..... | 2  |
| 3. HRMS data of the target compounds 4a-4i and 7a-7i..... | 21 |

## 1. Purity of the target compounds 4a-4i and 7a-7i

**Instrumental equipment and conditions:** An Agilent 1260 HPLC (Waldbronn, Germany) with diode array detection (DAD) was employed for chromatographic analyses. The column employed was an Agilent Eclipse Plus C18 (250 × 4.6 mm, 5 μm). The mobile phase used methanol and water (85:15 v/v) with a flow rate of 1.0 mLmin<sup>-1</sup>, and the column temperature was held at 25 °C. The injection volume was set at 10 μL with detection wavelength of 283 nm.

Table S1. Purity of the target compounds **4a-4i** and **7a-7i**

| Compounds | t <sub>R</sub> (min) | Purity (%) |
|-----------|----------------------|------------|
| <b>4a</b> | 14.214               | 96.45      |
| <b>4b</b> | 14.364               | 98.72      |
| <b>4c</b> | 9.369                | 99.45      |
| <b>4d</b> | 18.244               | 99.68      |
| <b>4e</b> | 14.272               | 98.69      |
| <b>4f</b> | 10.649               | 99.70      |
| <b>4g</b> | 12.303               | 98.20      |
| <b>4h</b> | 15.154               | 97.52      |
| <b>4i</b> | 14.220               | 97.60      |
| <b>7a</b> | 12.713               | 99.59      |
| <b>7b</b> | 12.669               | 99.20      |
| <b>7c</b> | 16.682               | 99.86      |
| <b>7d</b> | 16.266               | 97.57      |
| <b>7e</b> | 14.819               | 98.71      |
| <b>7f</b> | 12.499               | 99.35      |
| <b>7g</b> | 10.980               | 98.97      |
| <b>7h</b> | 13.250               | 99.07      |
| <b>7i</b> | 15.614               | 99.84      |

## 2. NMR data of the target compounds 4a-4i and 7a-7i

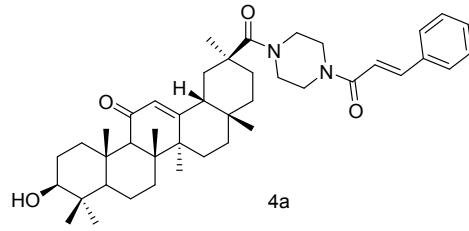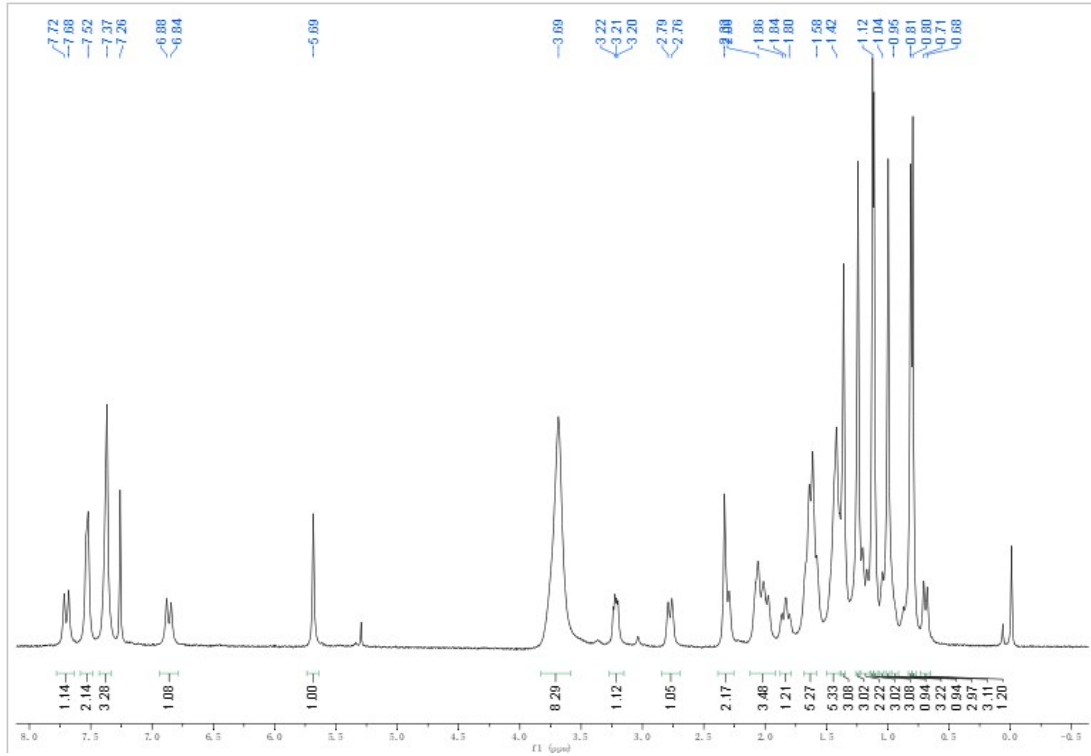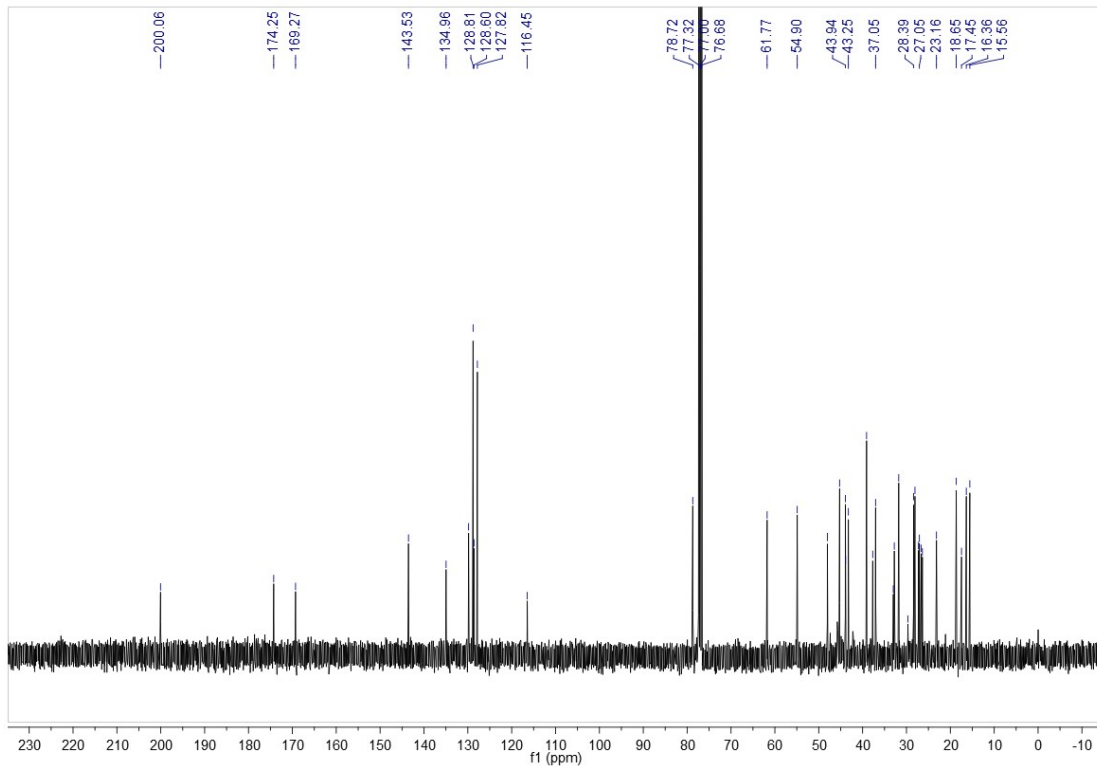

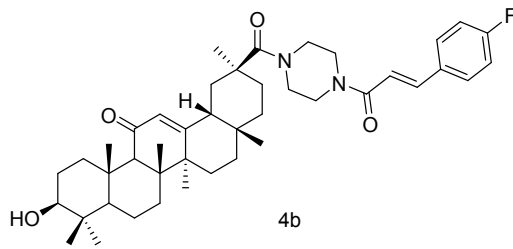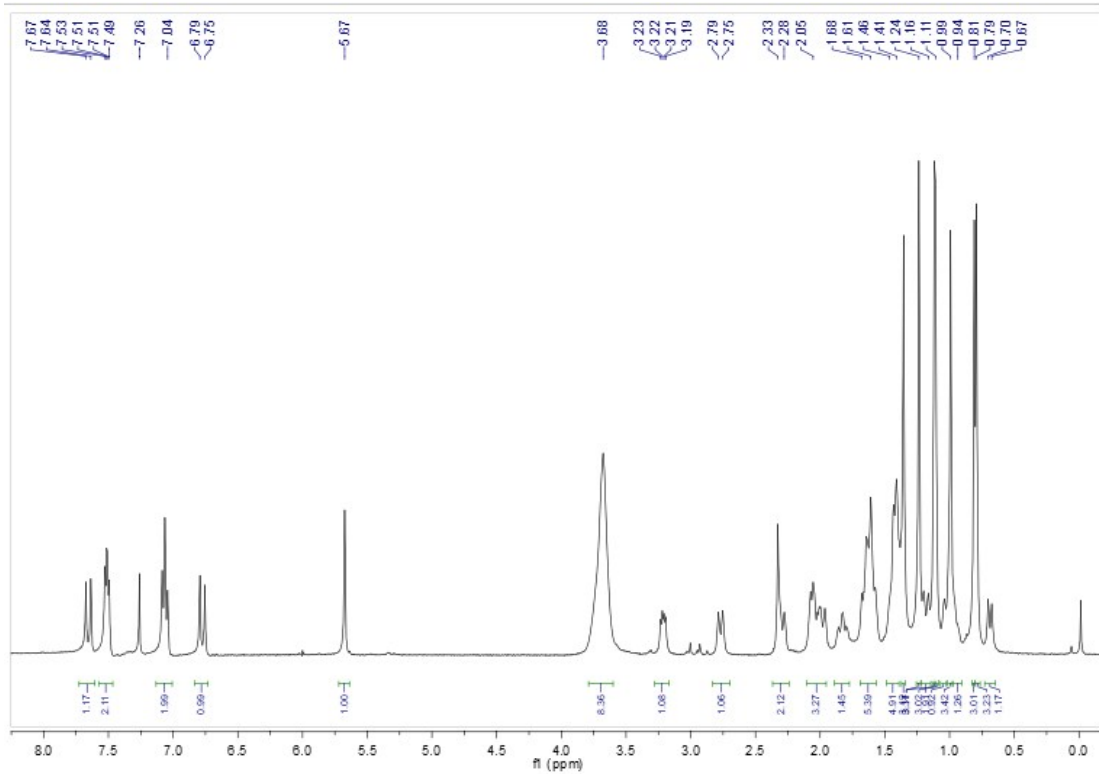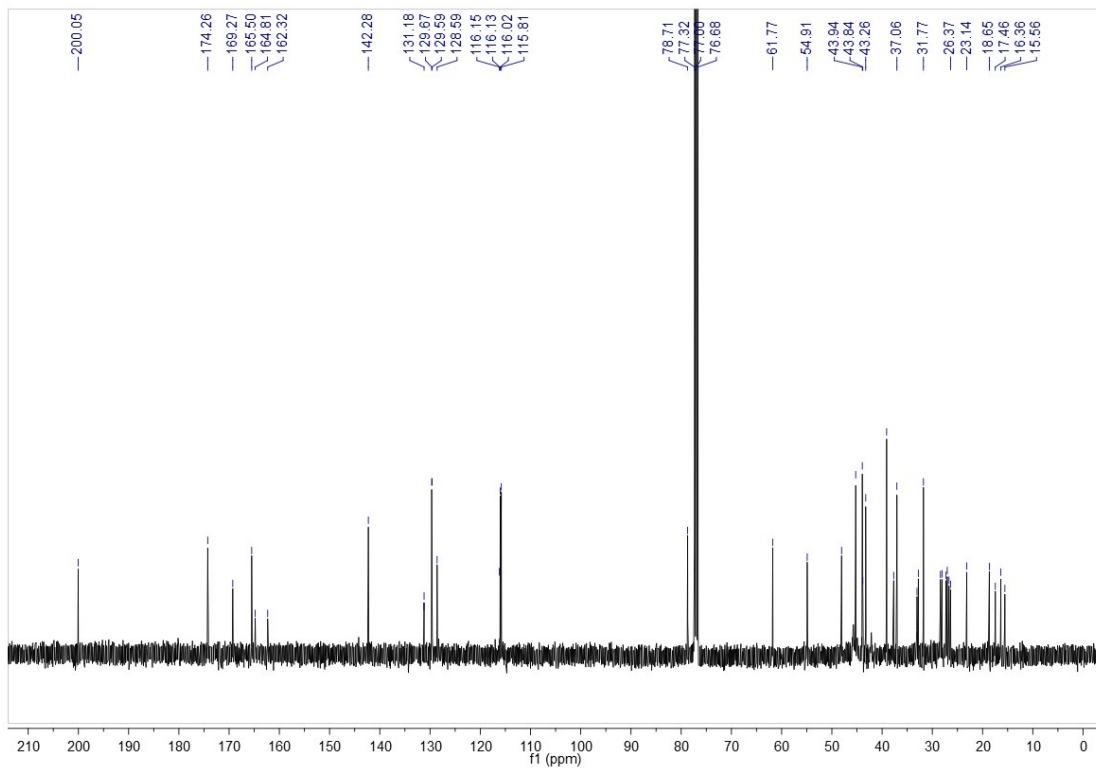

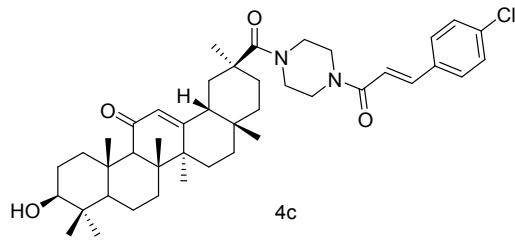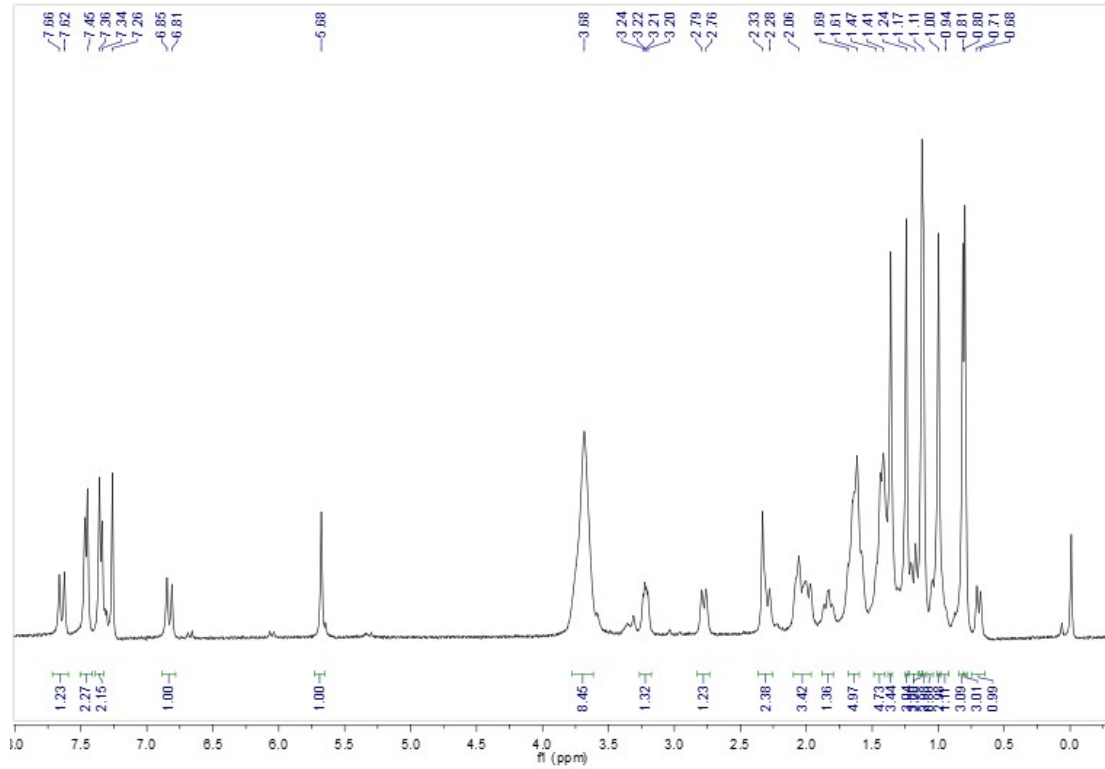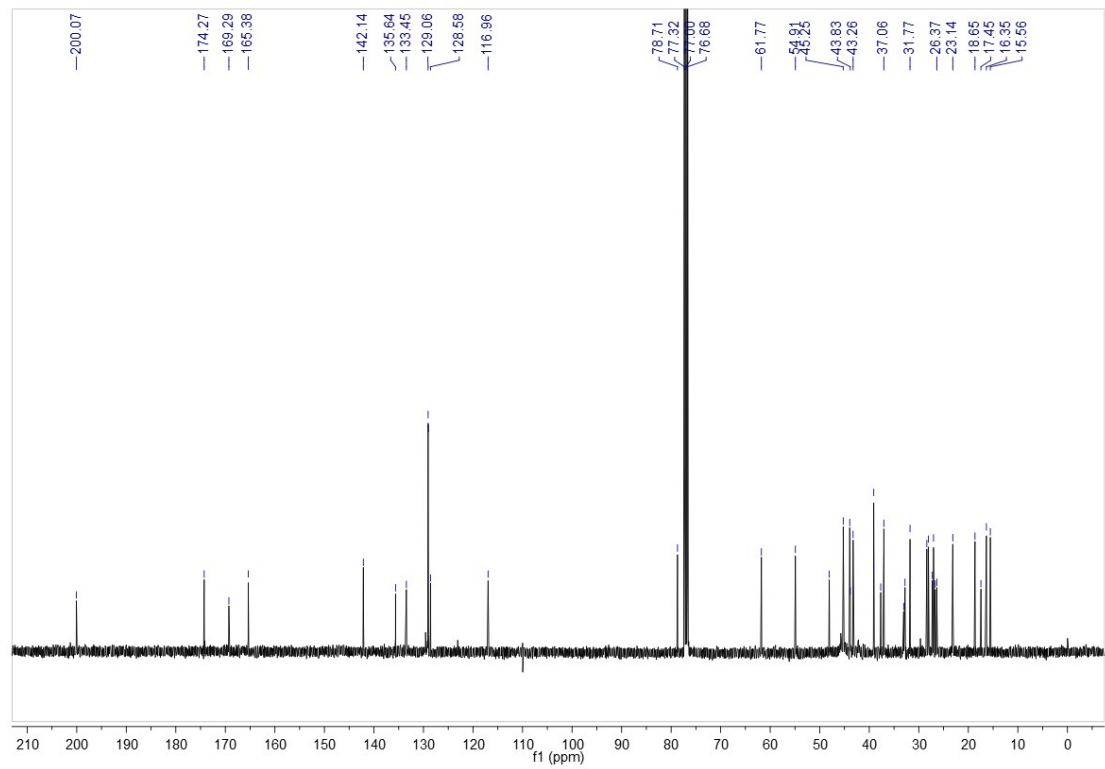

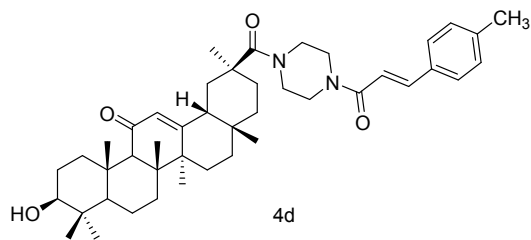

4d

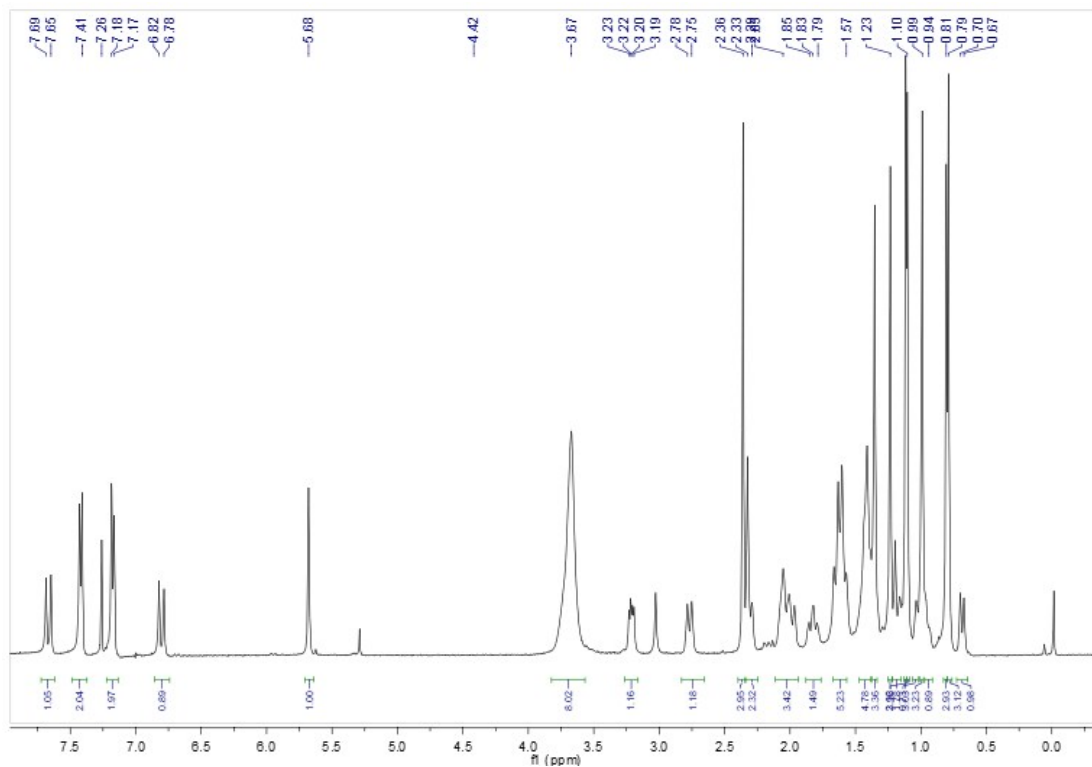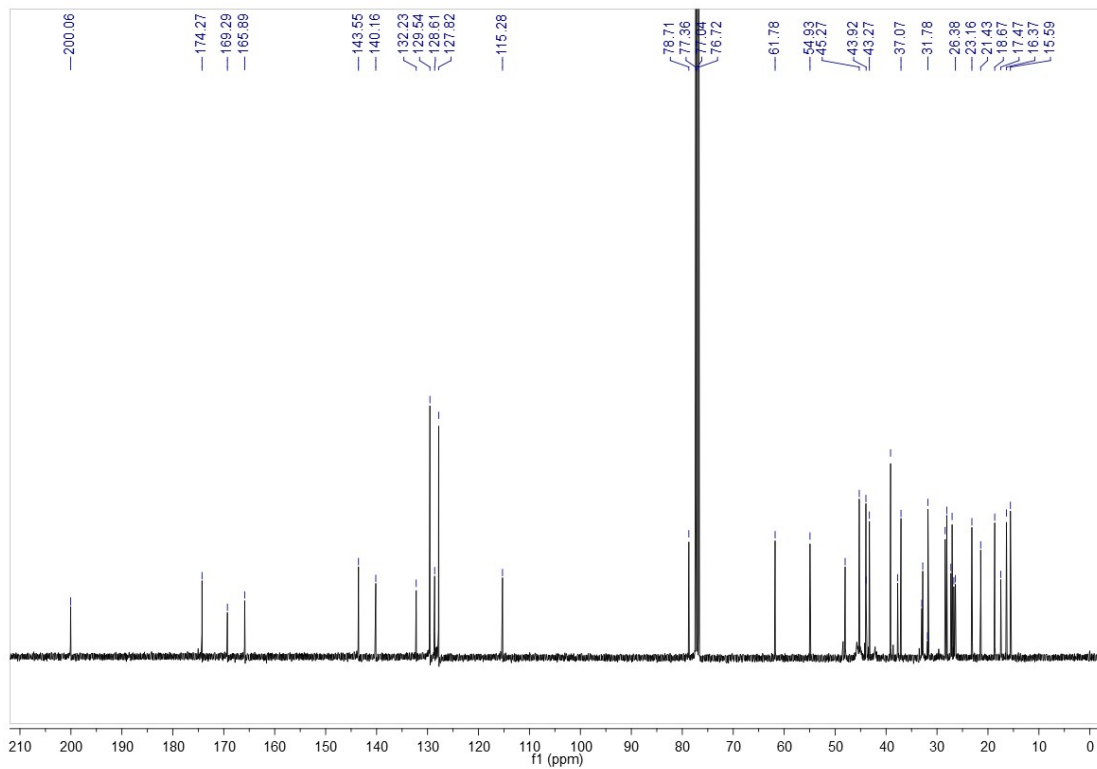

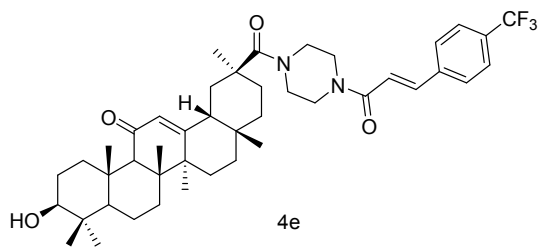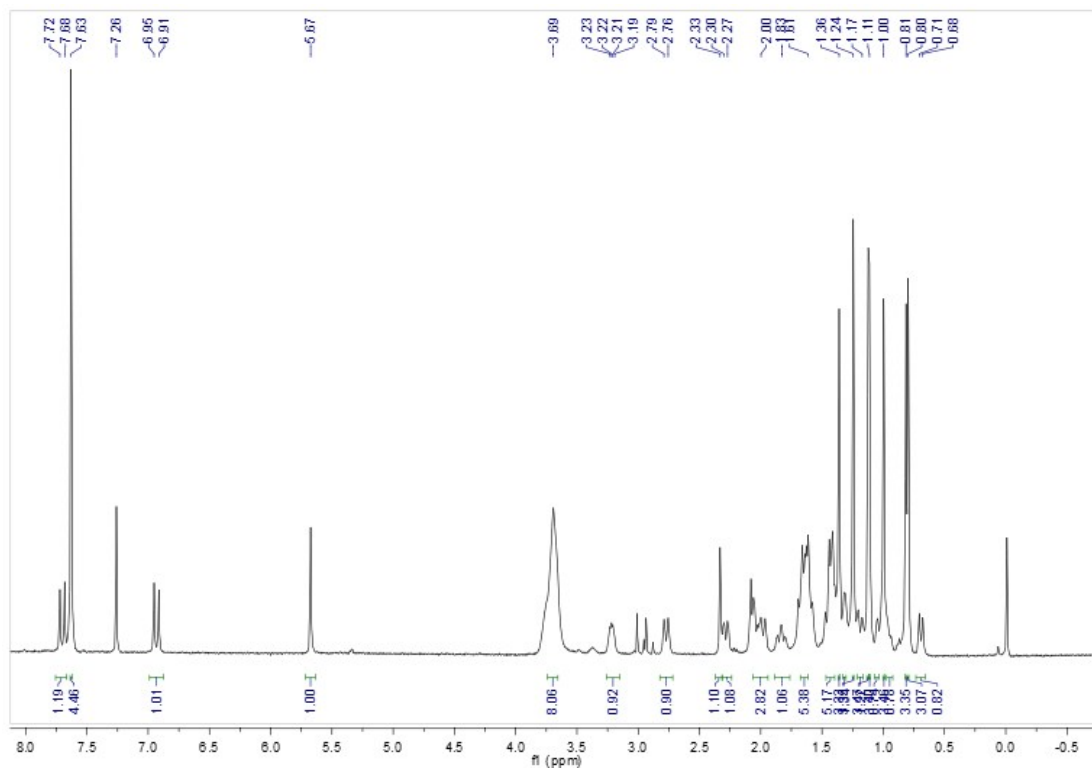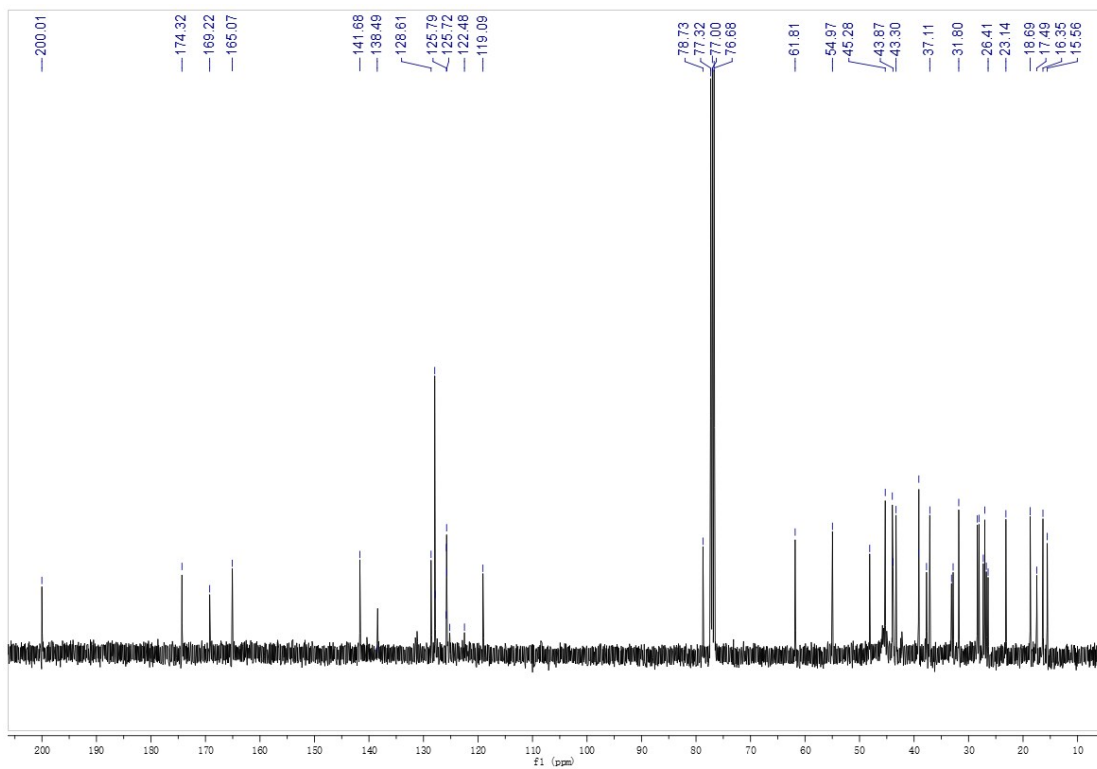

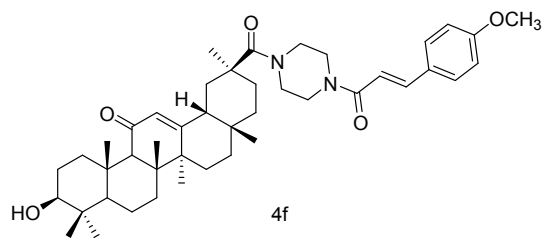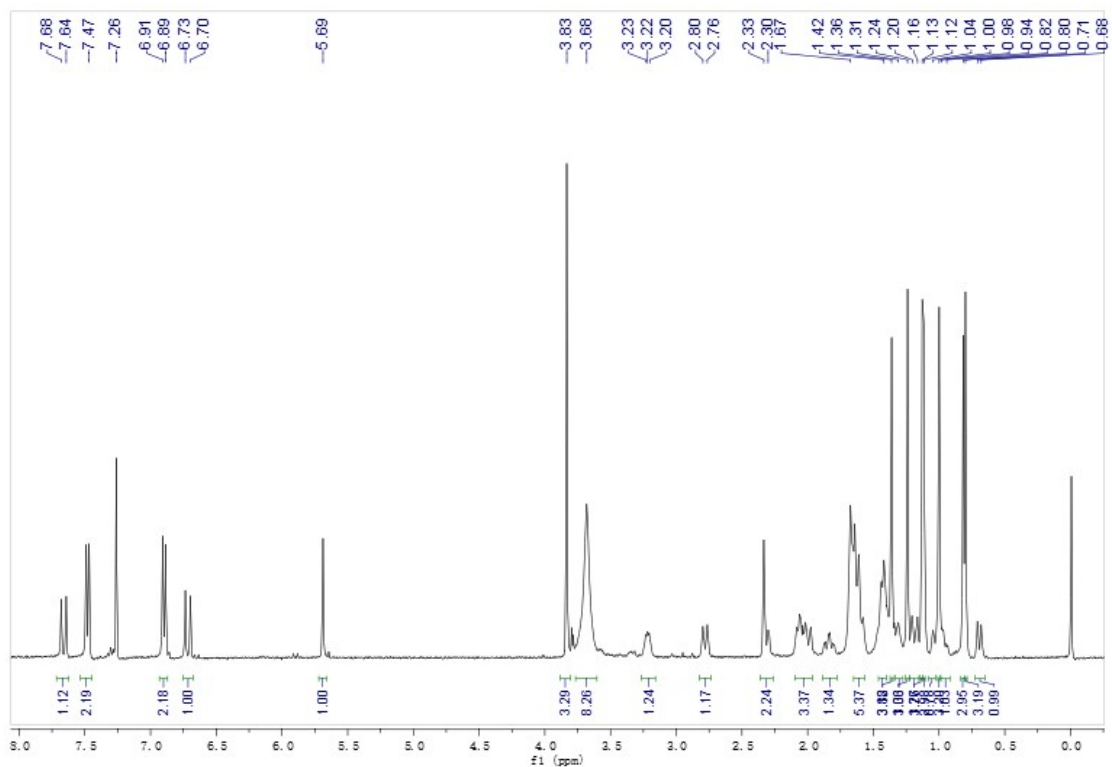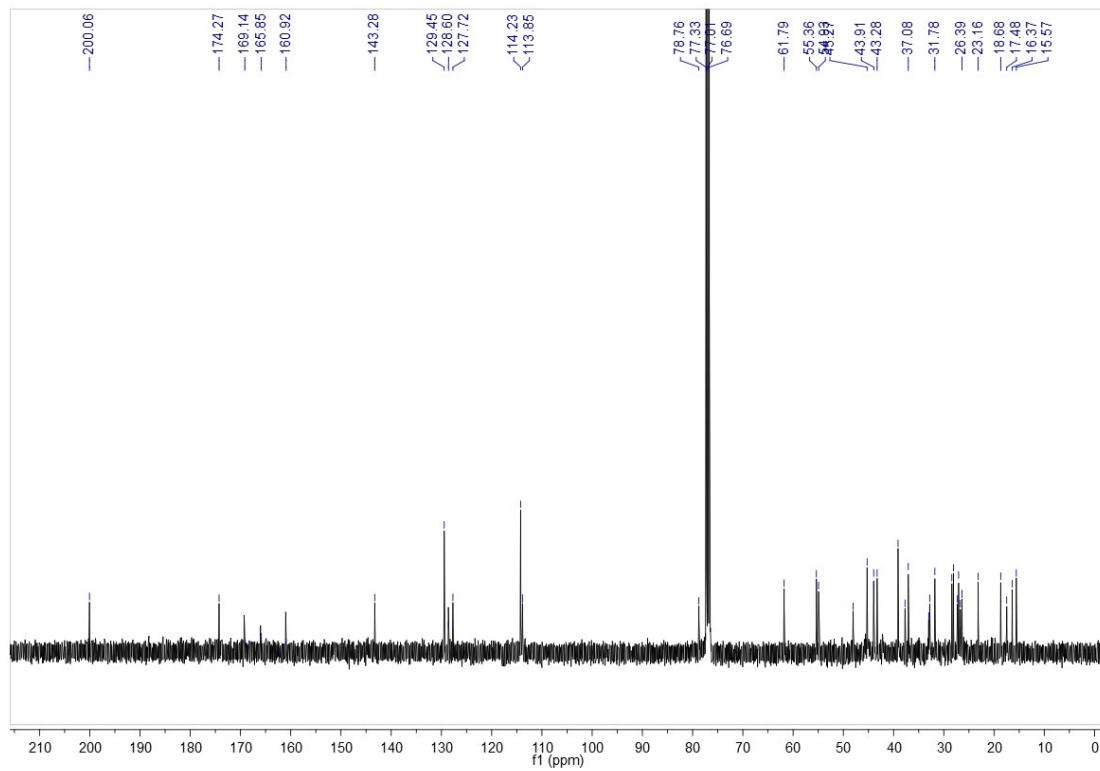



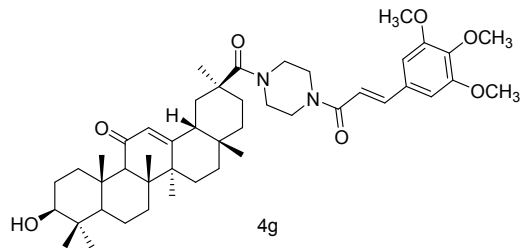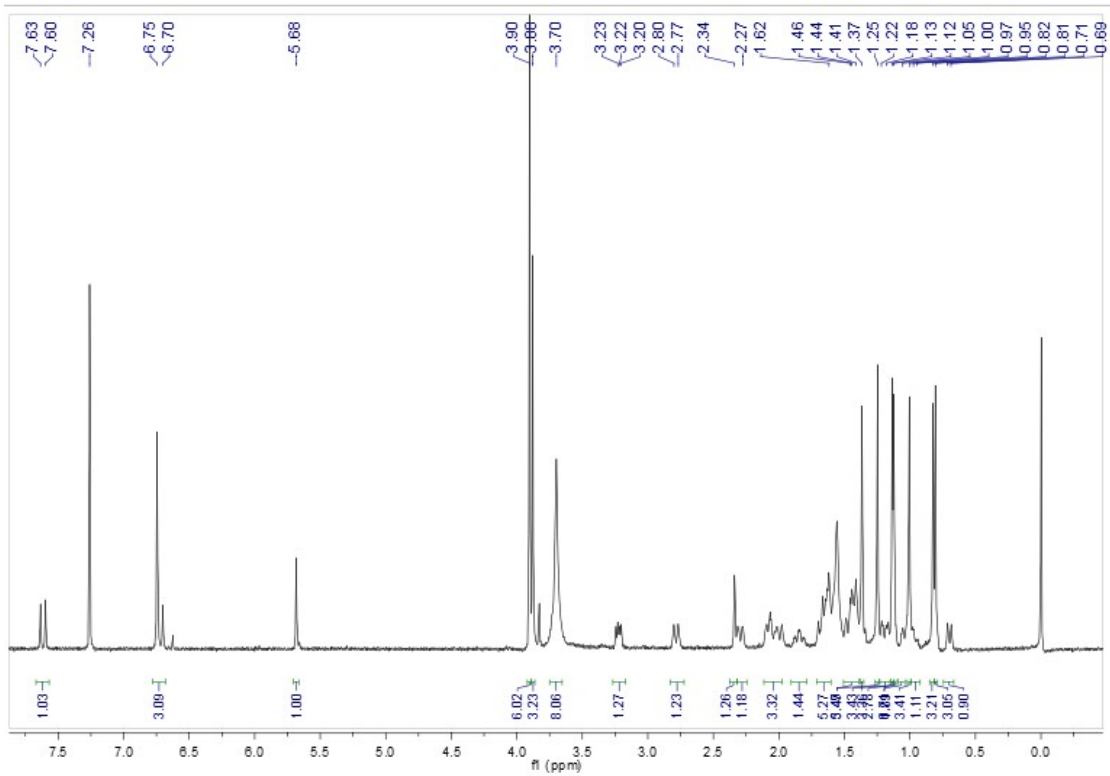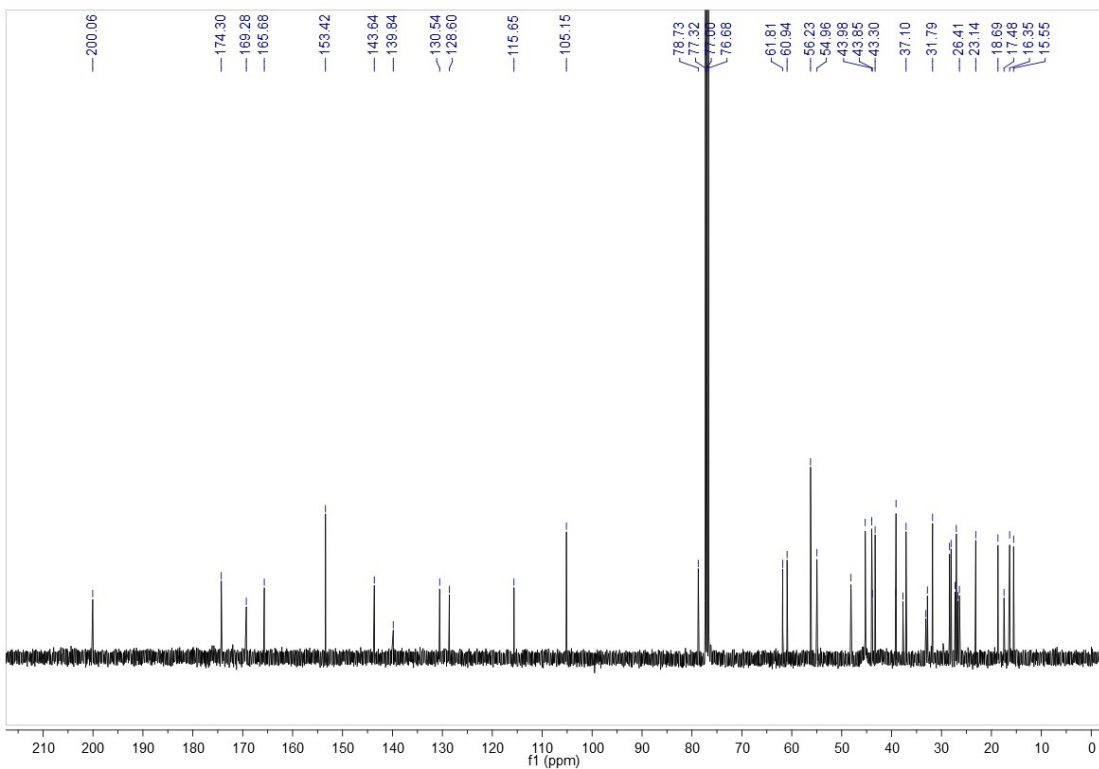

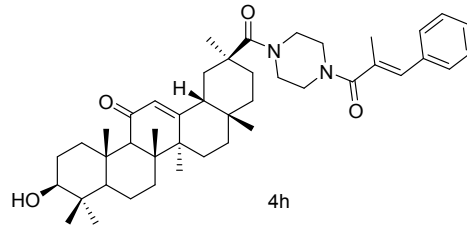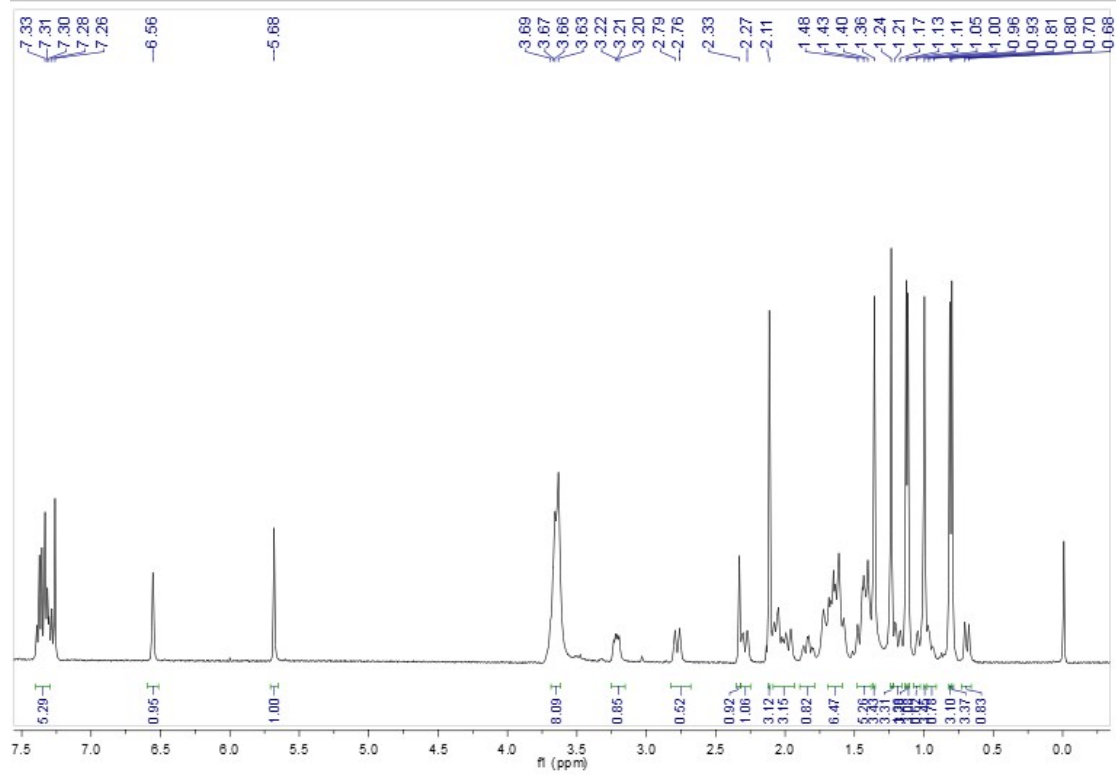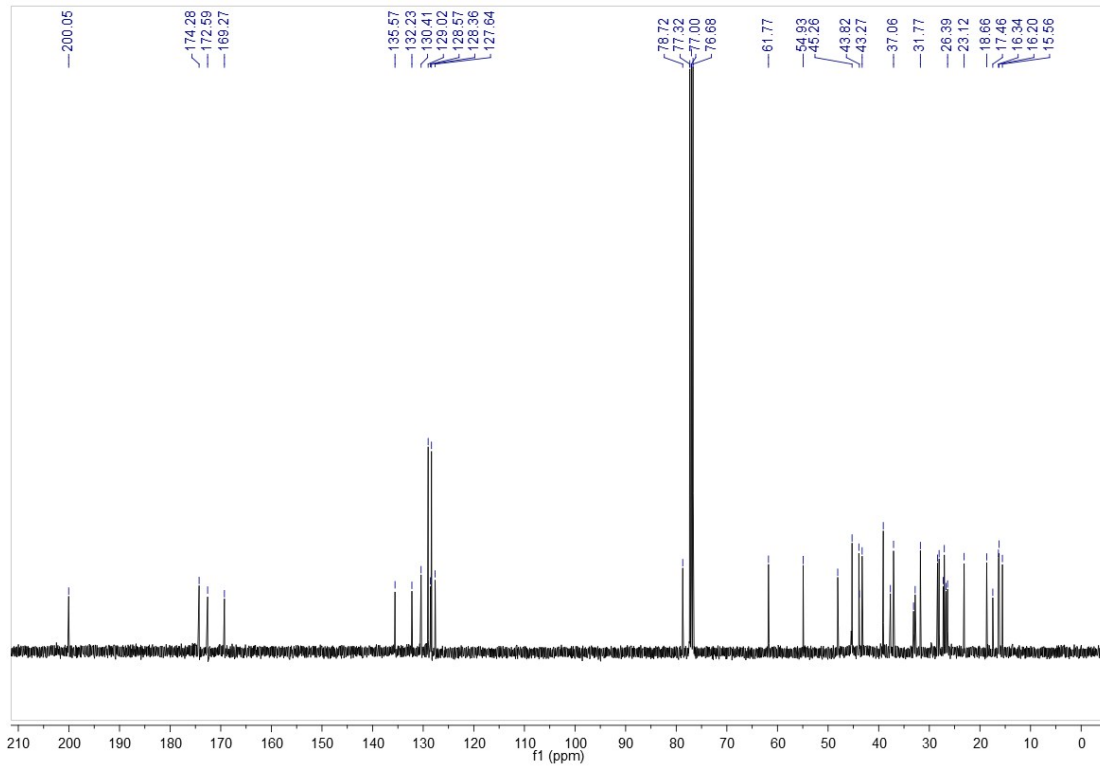

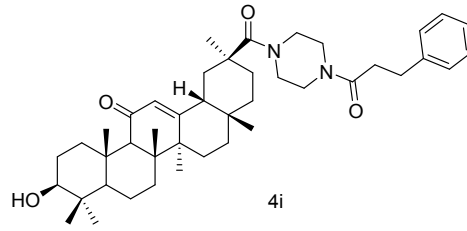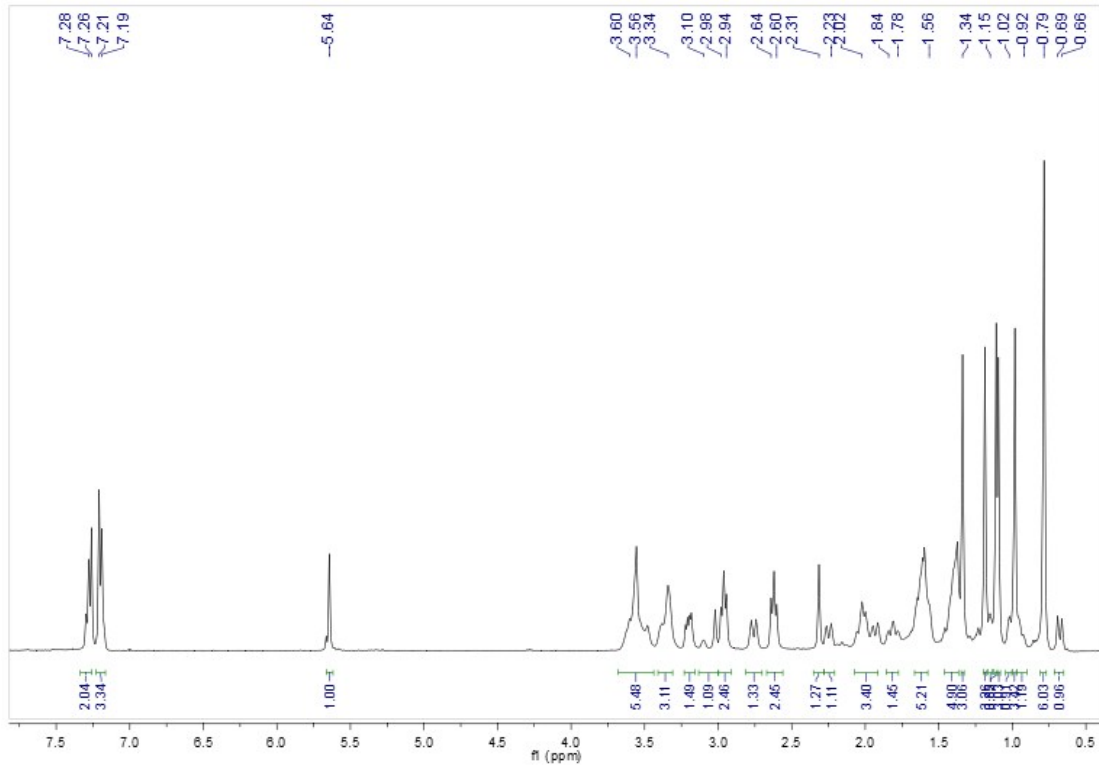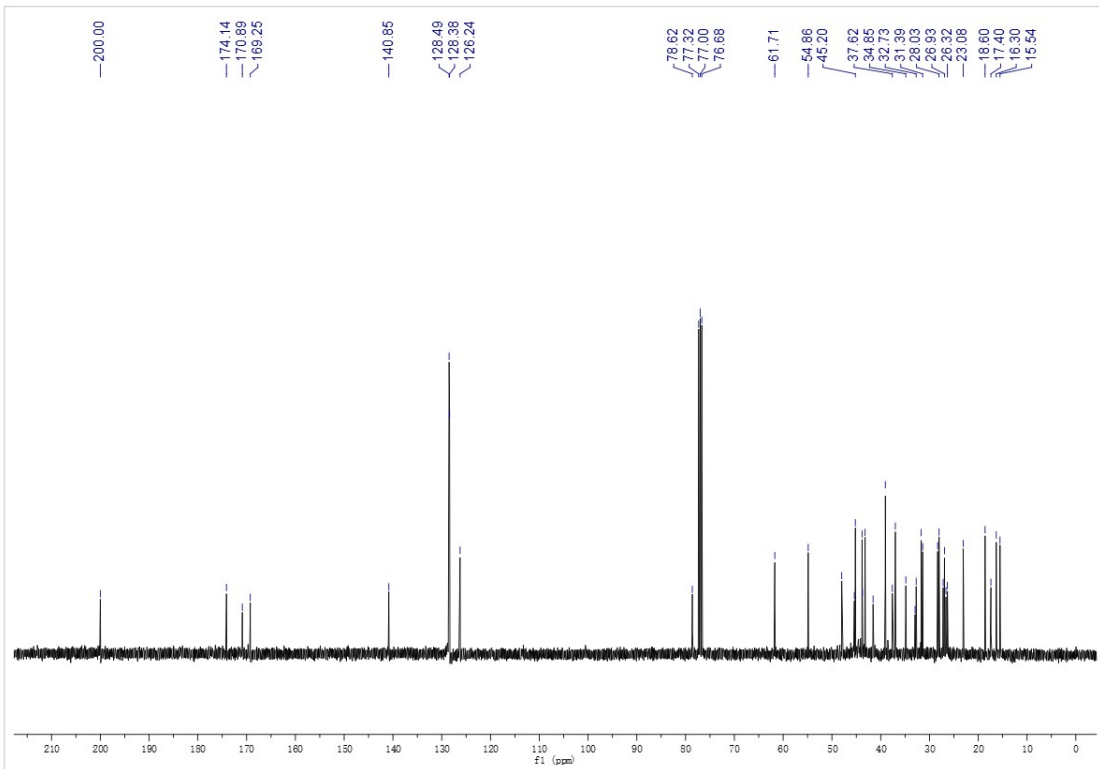

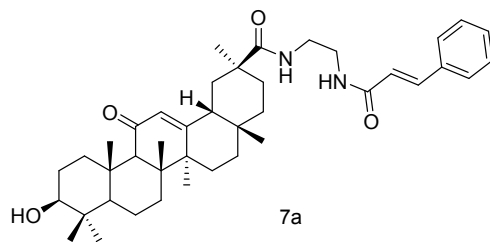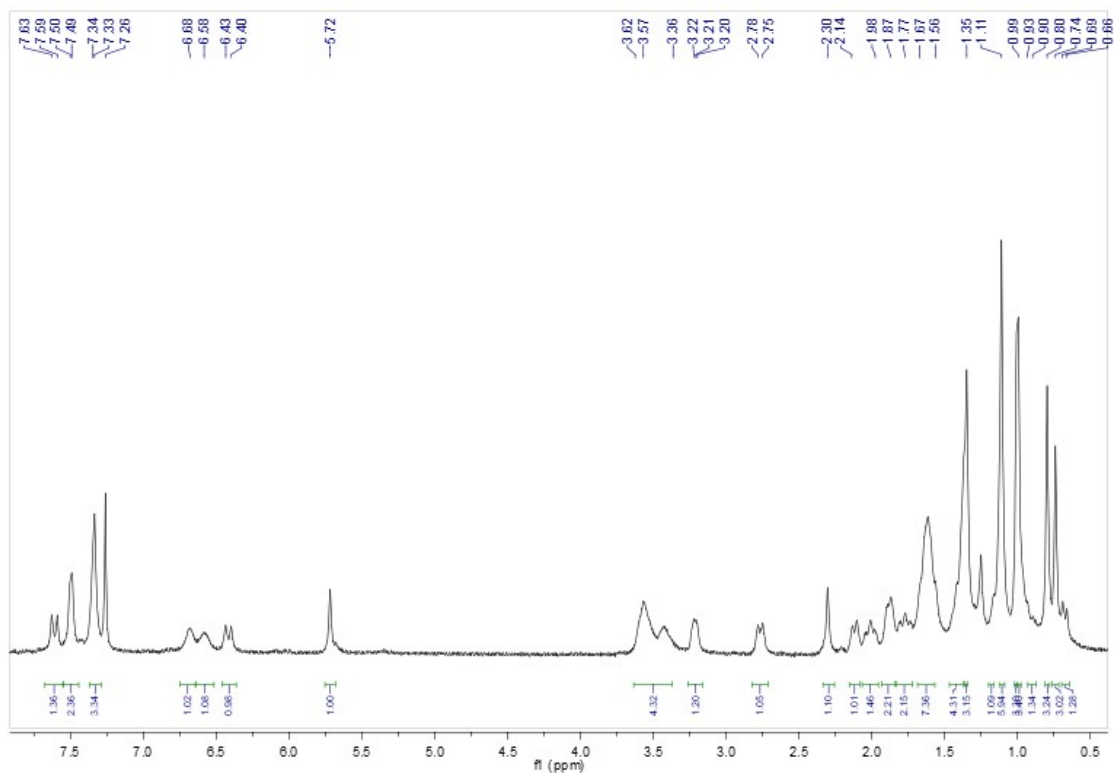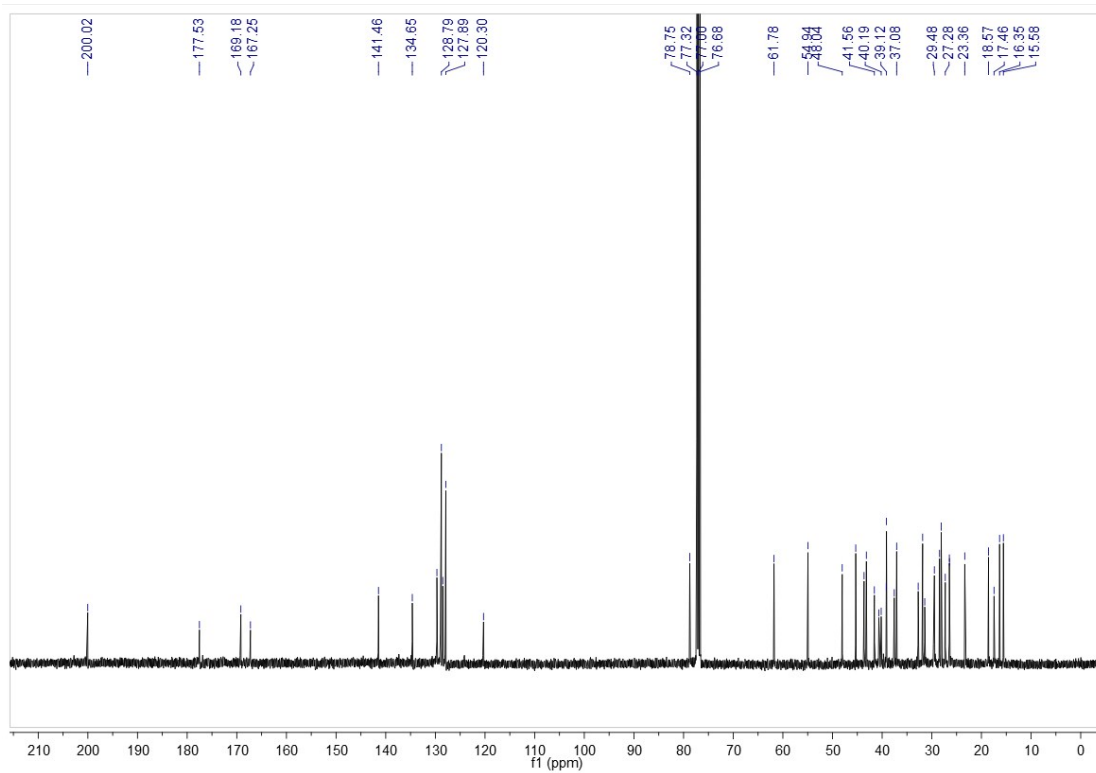

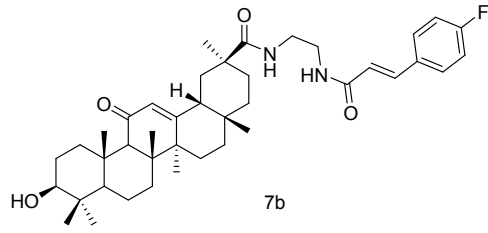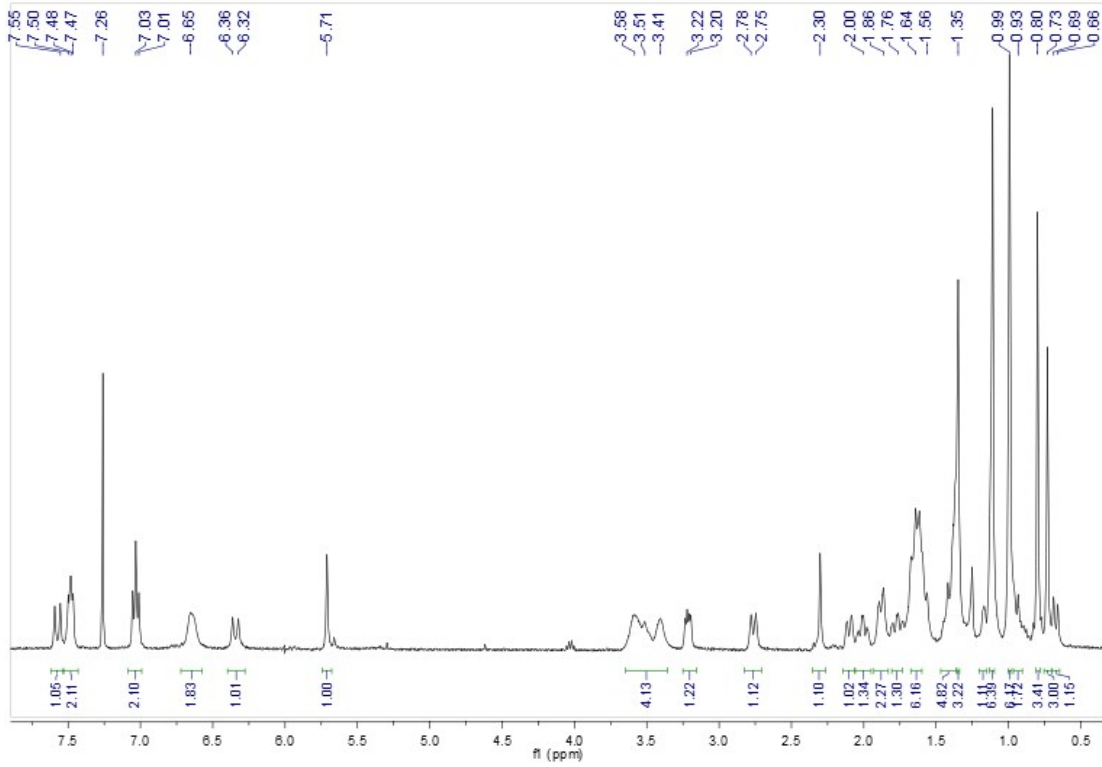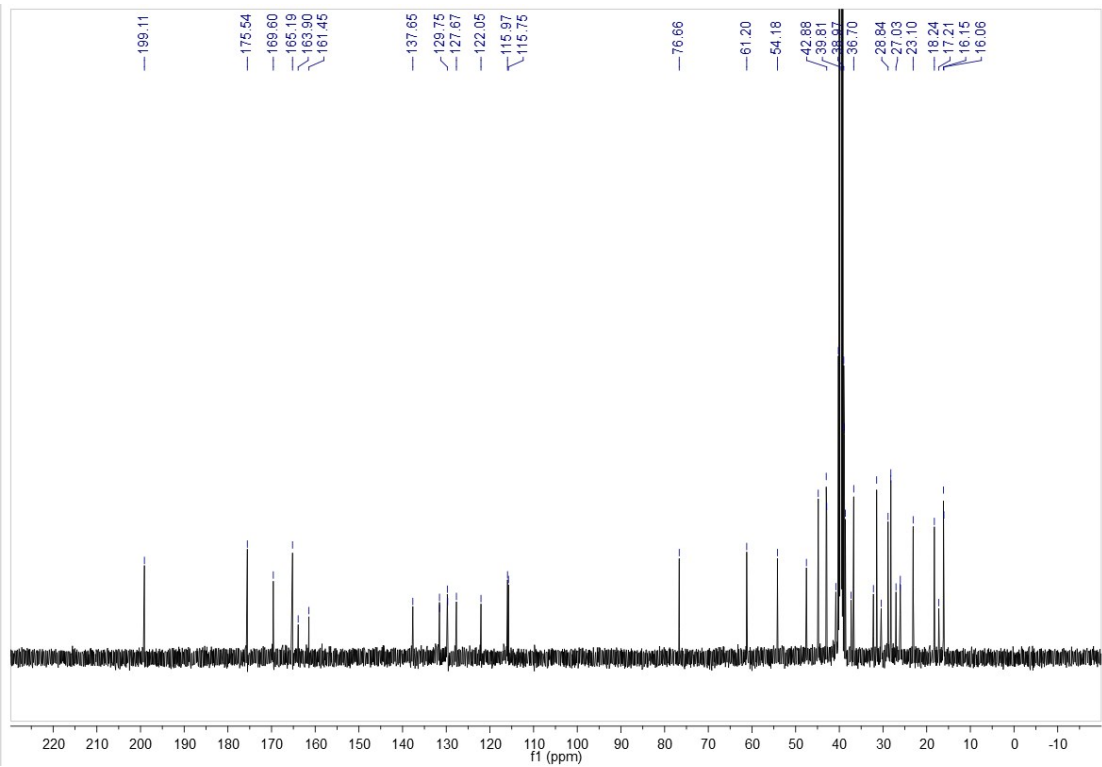

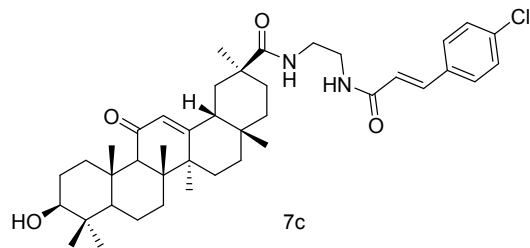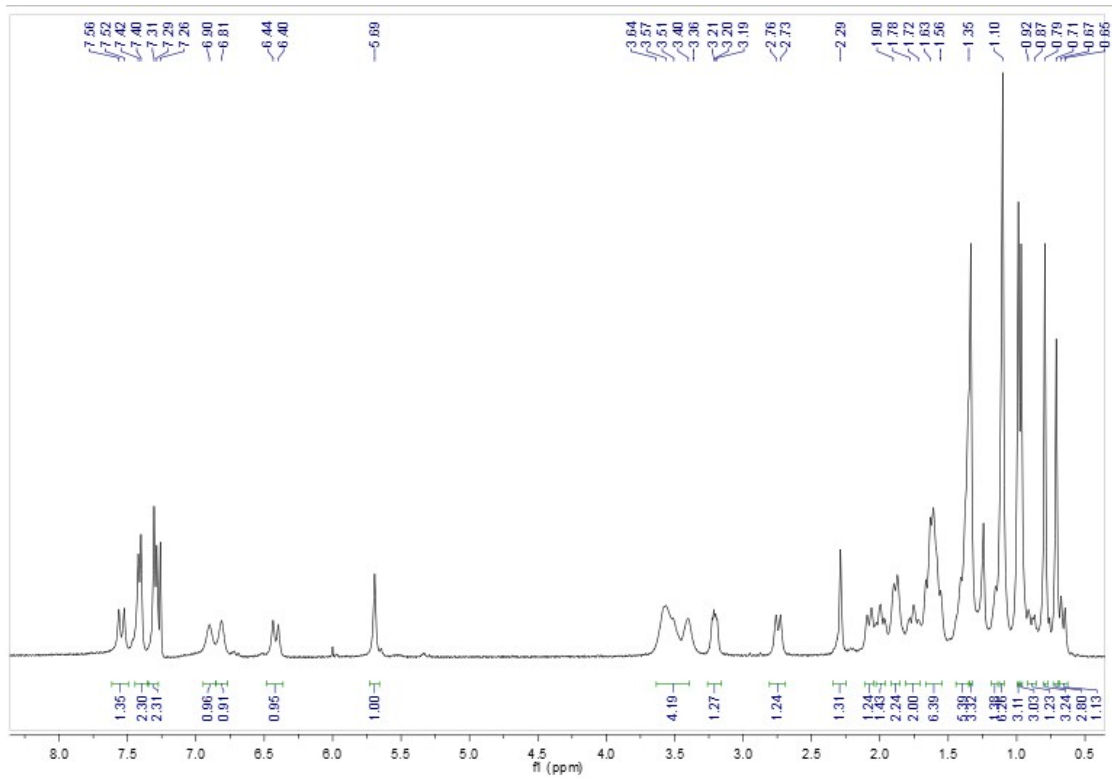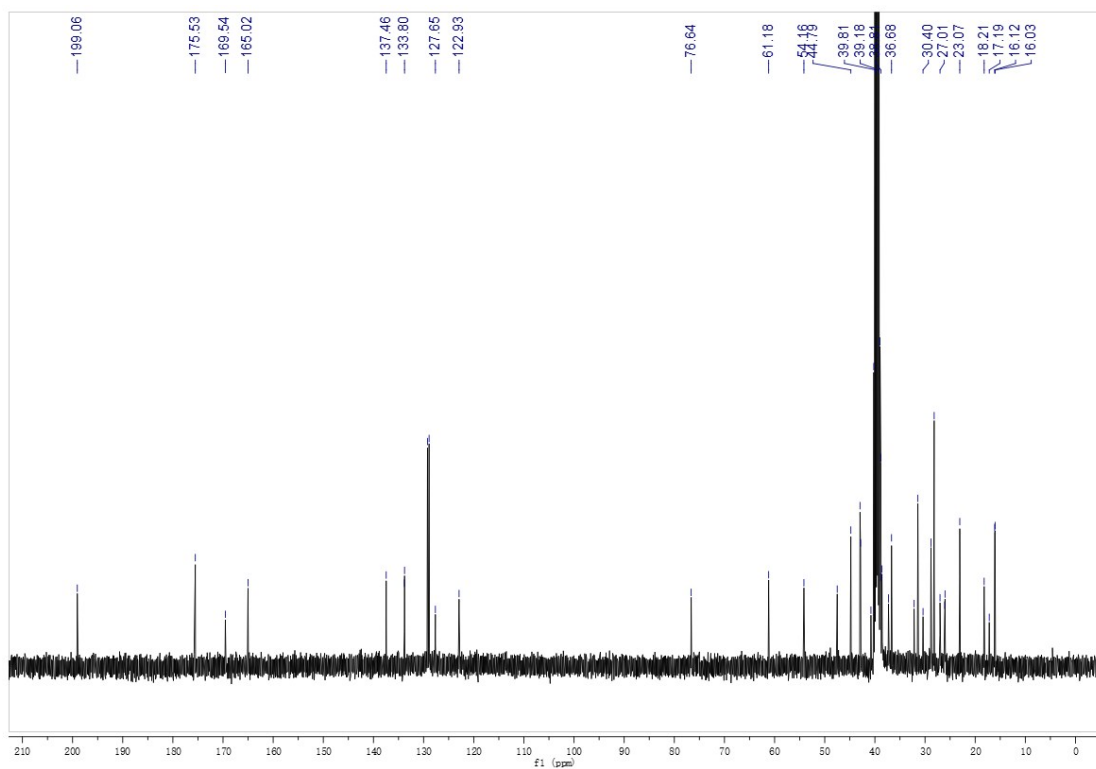

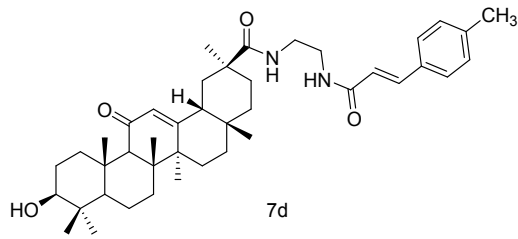

7d

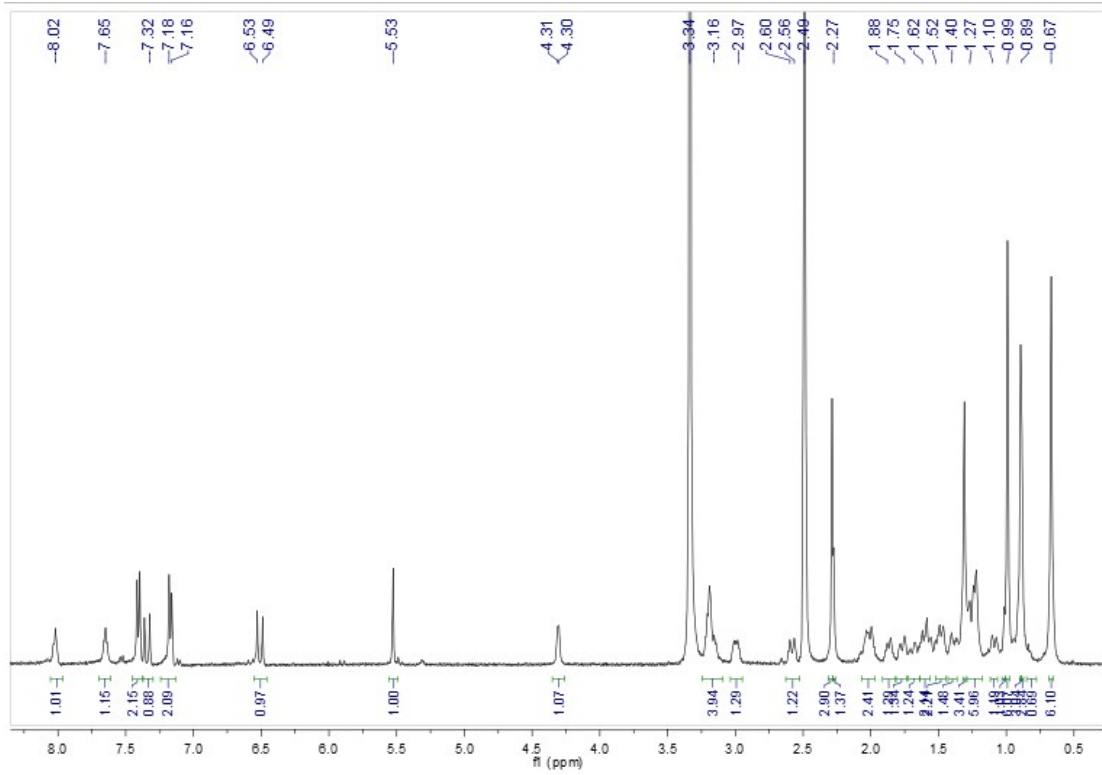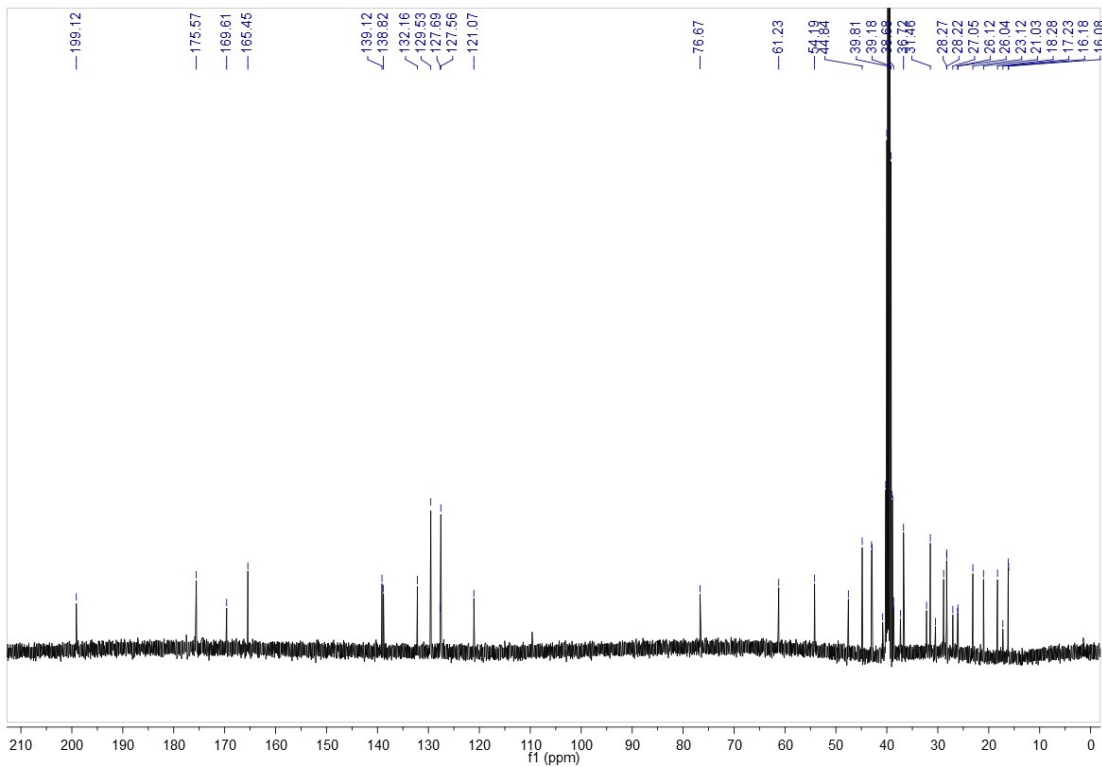

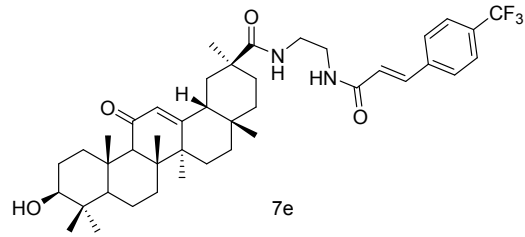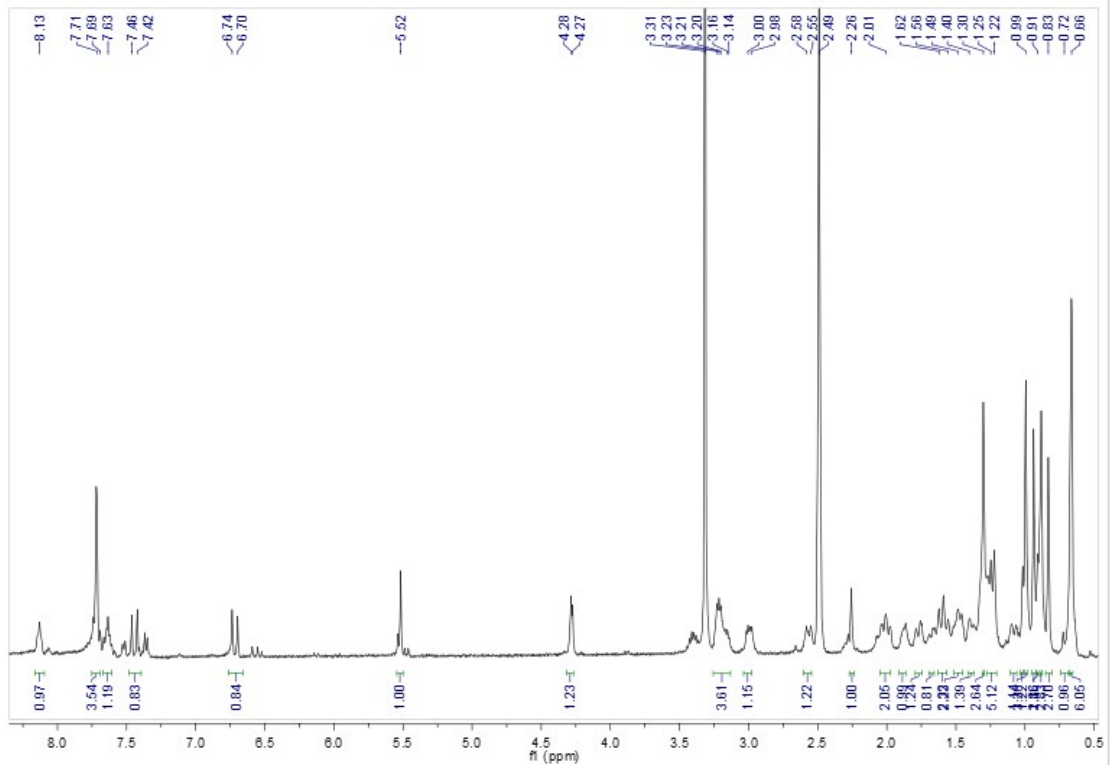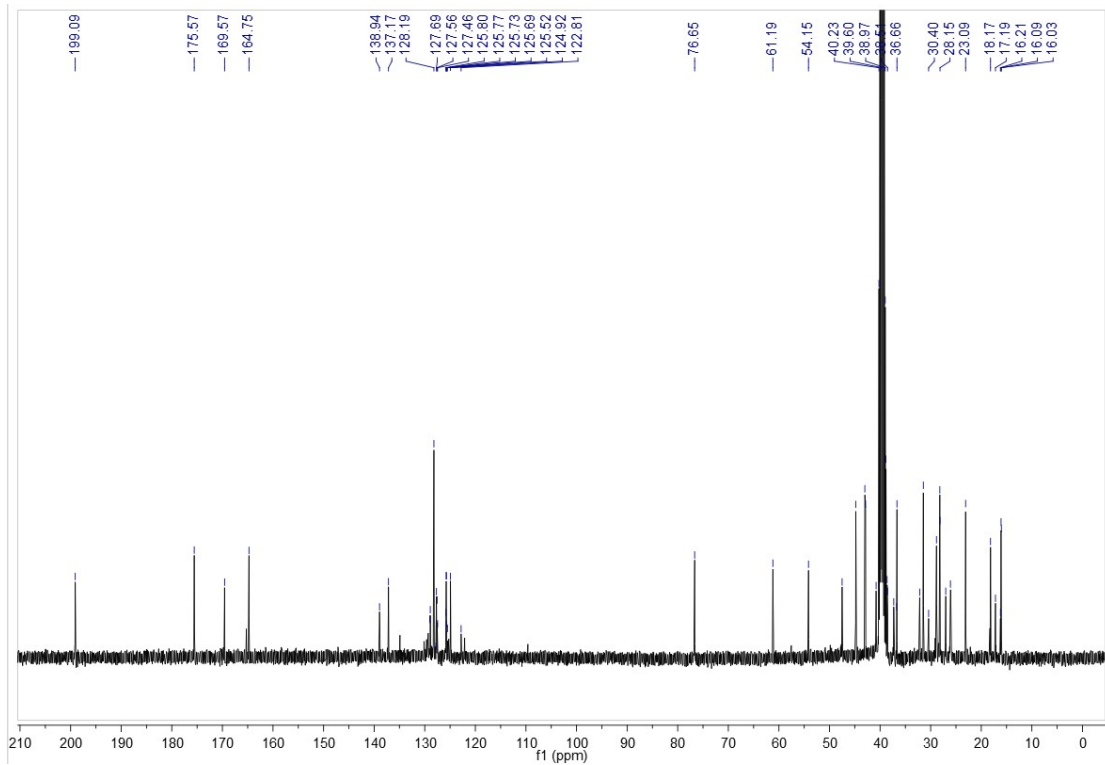



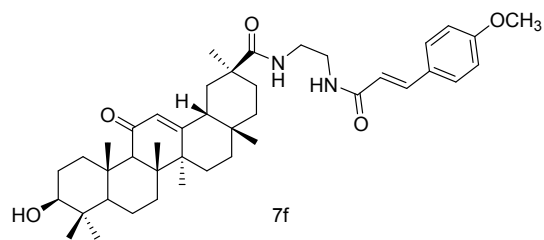

7f

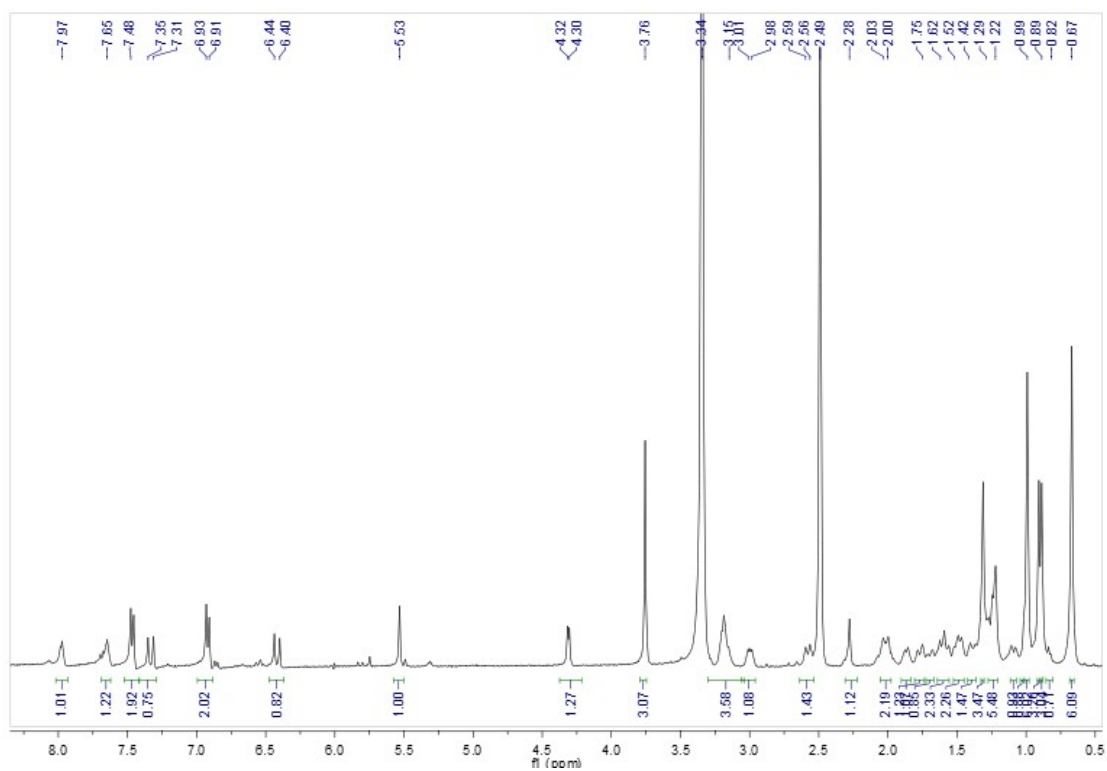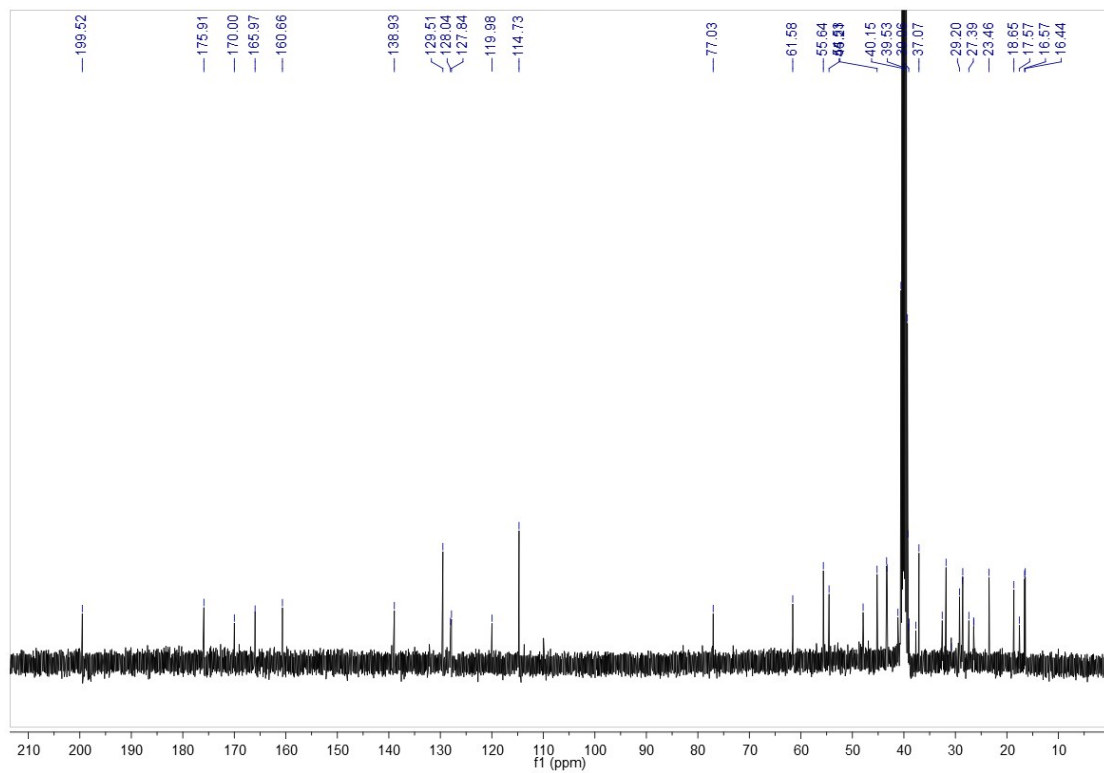

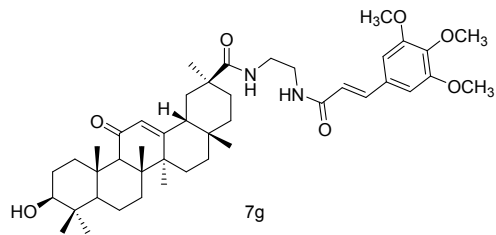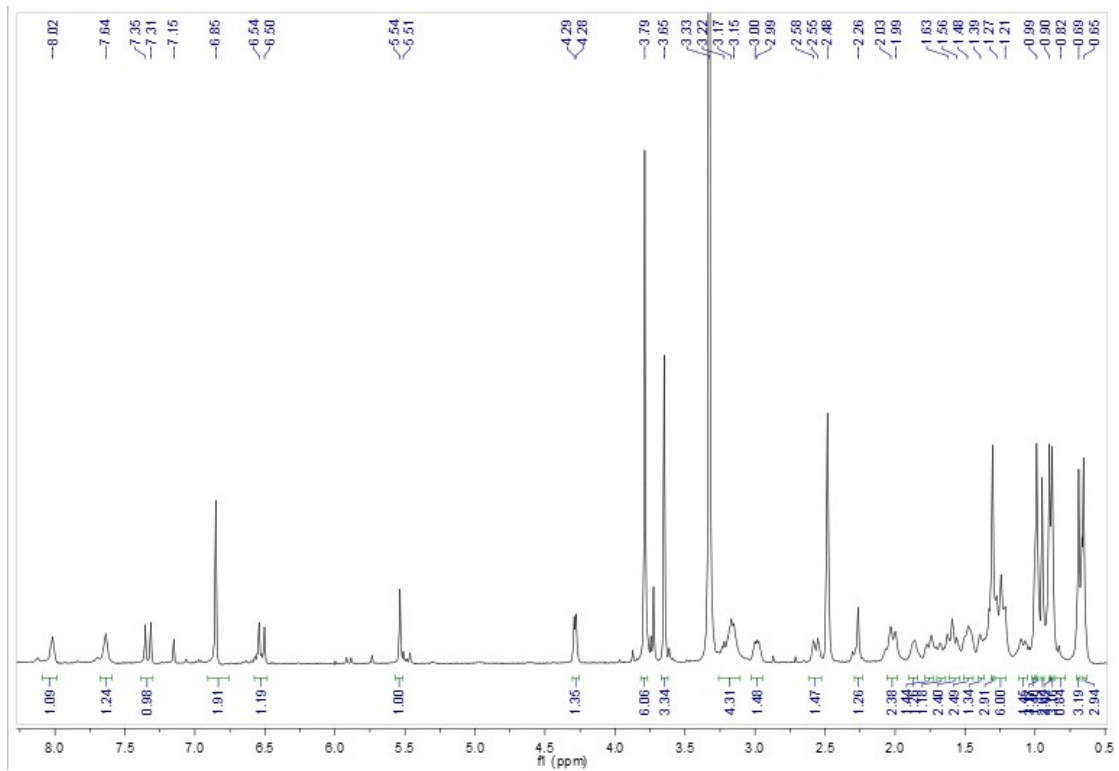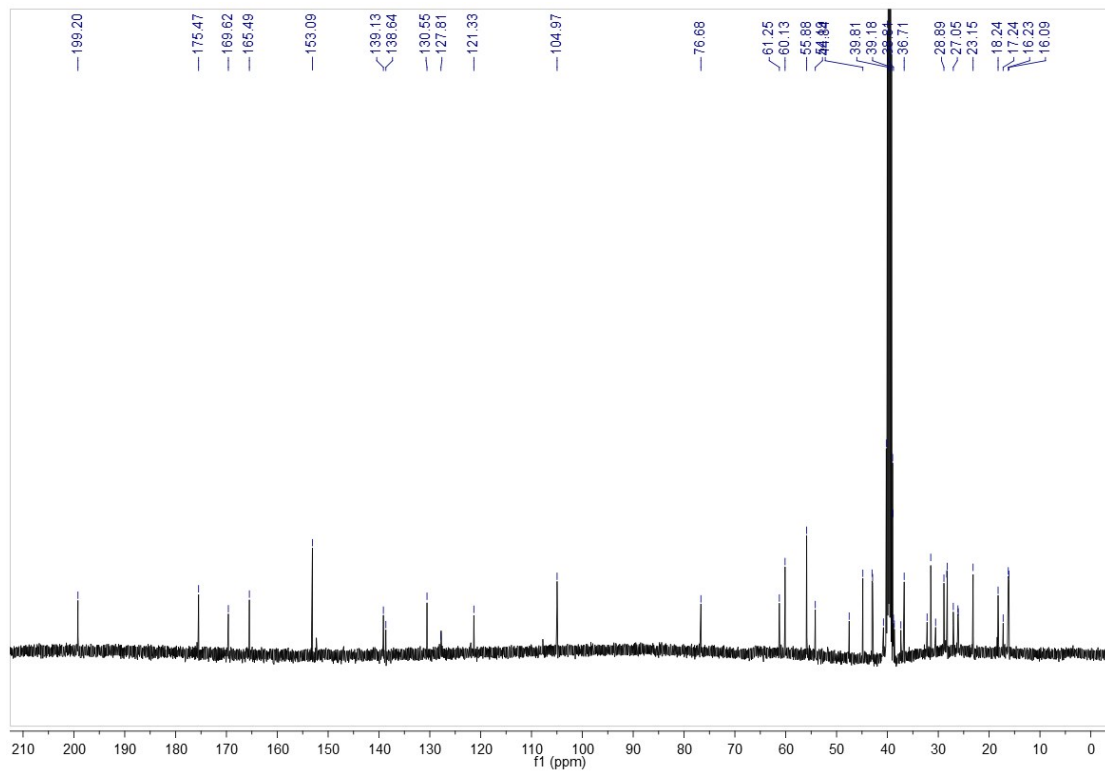

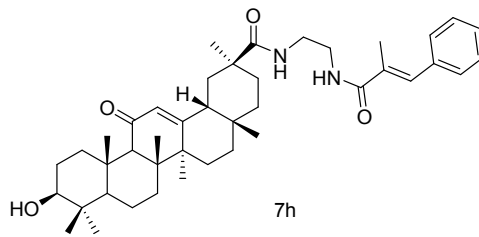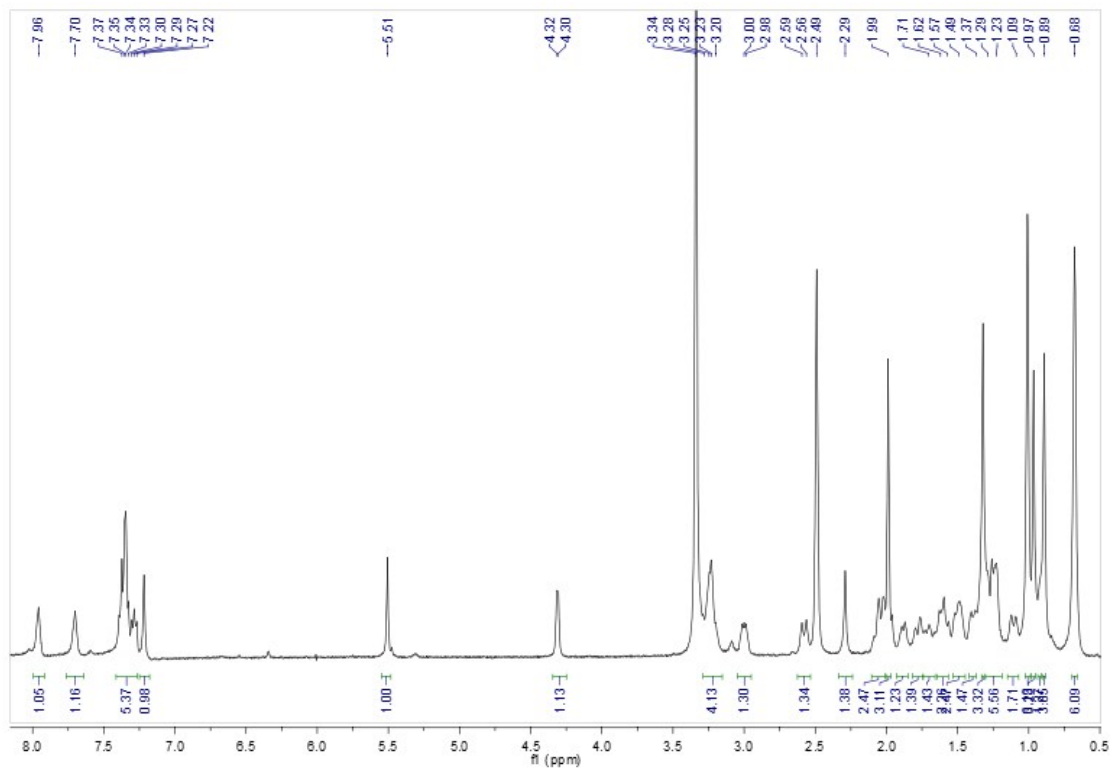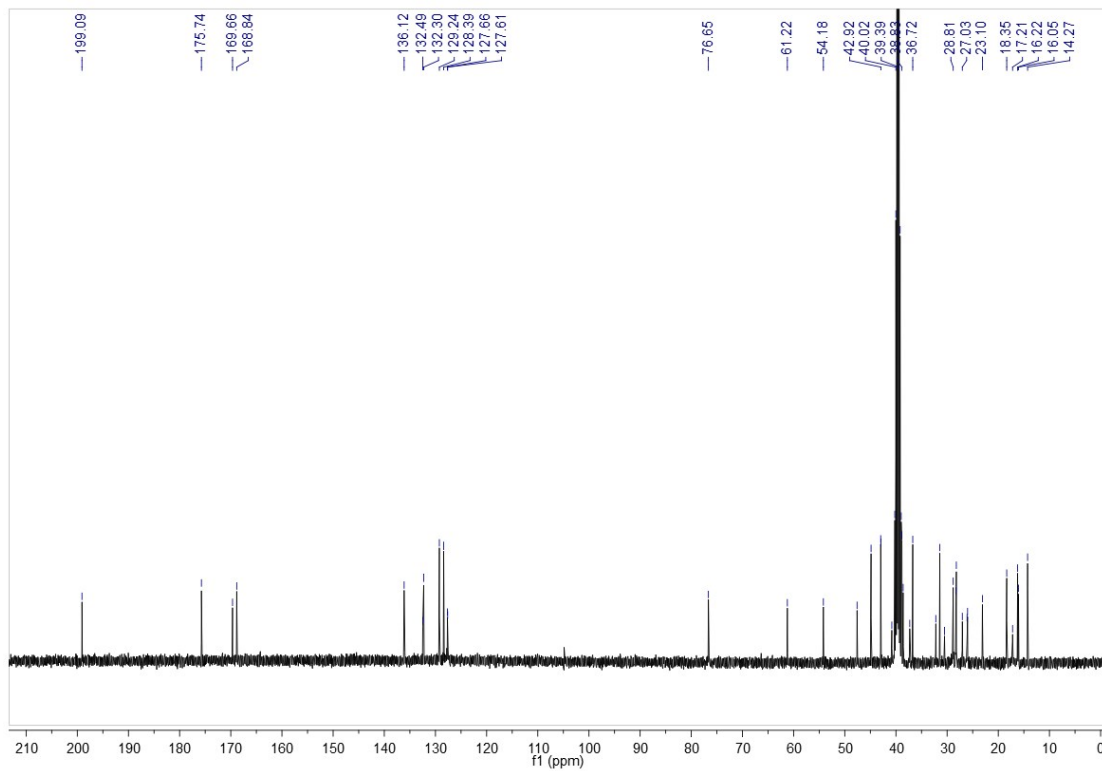

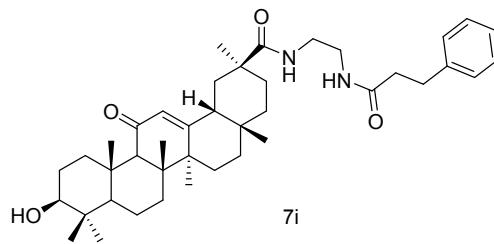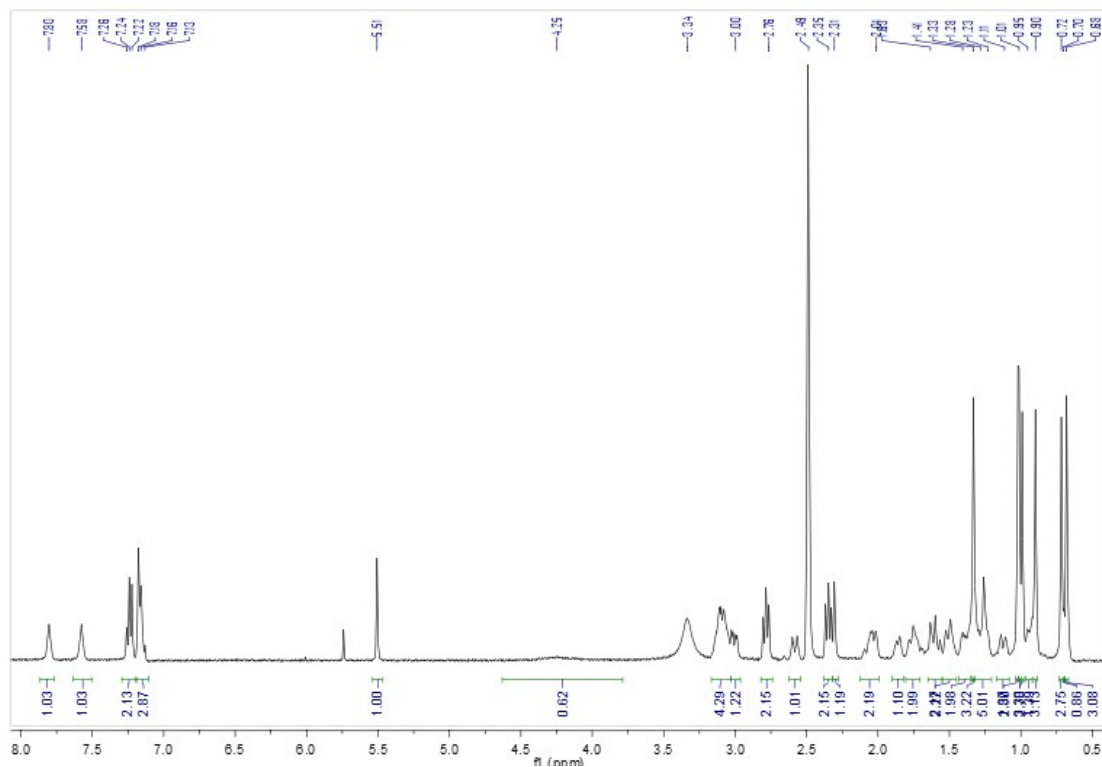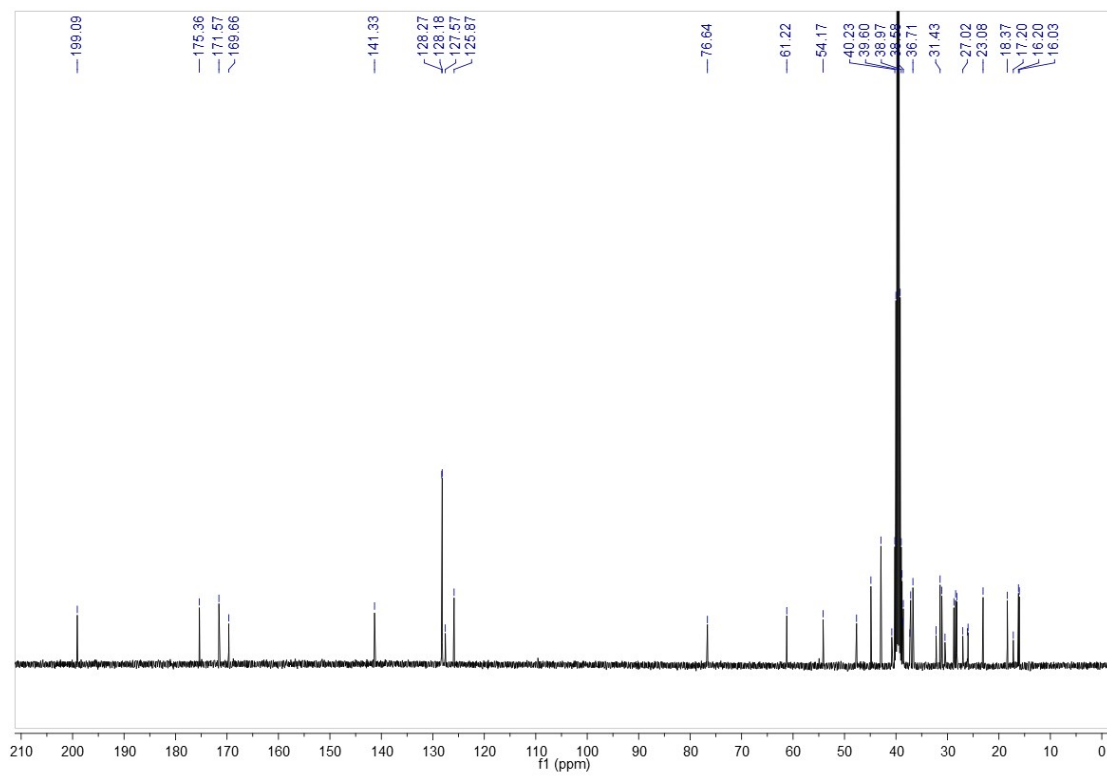

### 3. HRMS data of the target compounds 4a-4i and 7a-7i

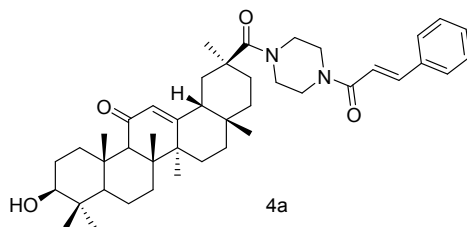

HRMS (ESI):  $m/z$  calcd for C<sub>43</sub>H<sub>61</sub>N<sub>2</sub>O<sub>4</sub> [M+H]<sup>+</sup> 669.4631, found 669.4654

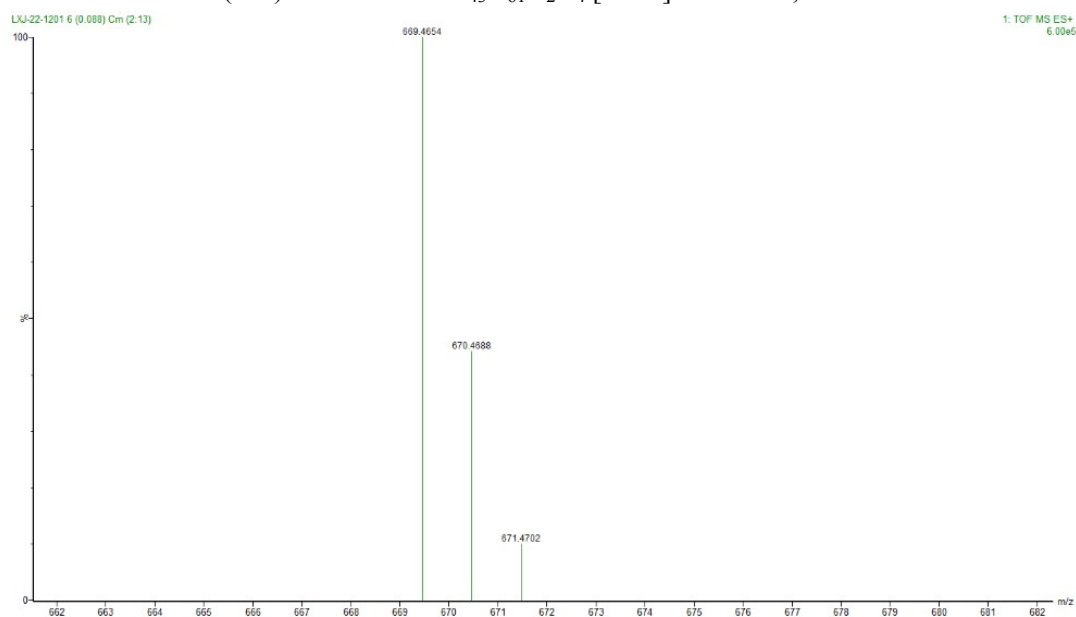

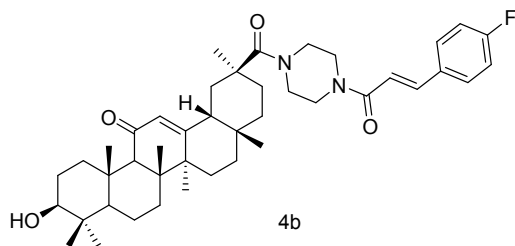

HRMS (ESI):  $m/z$  calcd for  $C_{43}H_{60}FN_2O_4$   $[M+H]^+$  687.4537, found 687.4558

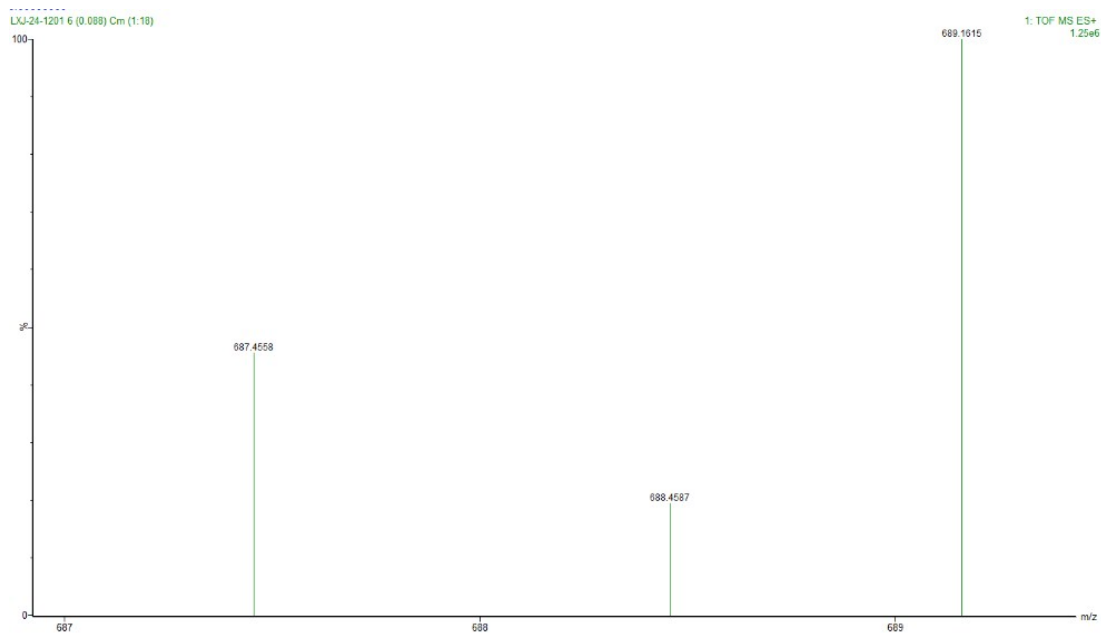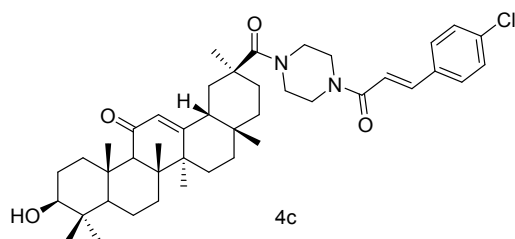

HRMS (ESI):  $m/z$  calcd for  $C_{43}H_{60}ClN_2O_4$   $[M+H]^+$  703.4242, found 703.4258

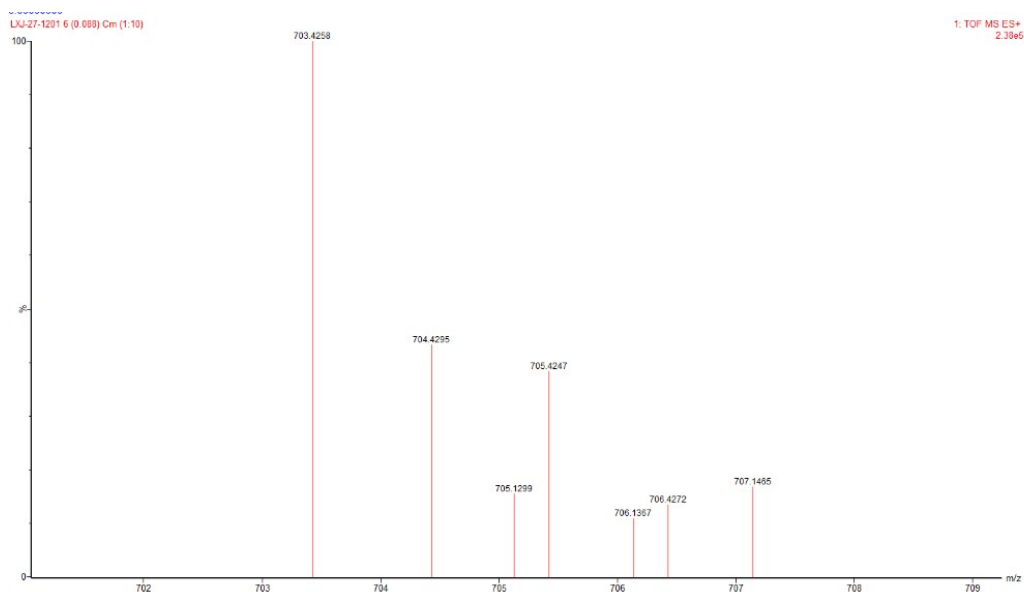

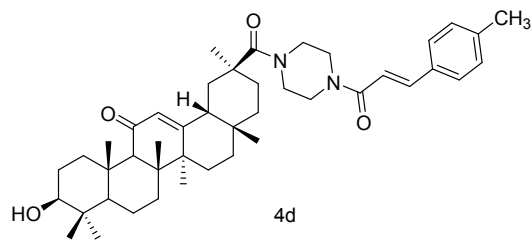

HRMS (ESI):  $m/z$  calcd for  $C_{44}H_{63}N_2O_4$   $[M+H]^+$  683.4788, found 683.4810.

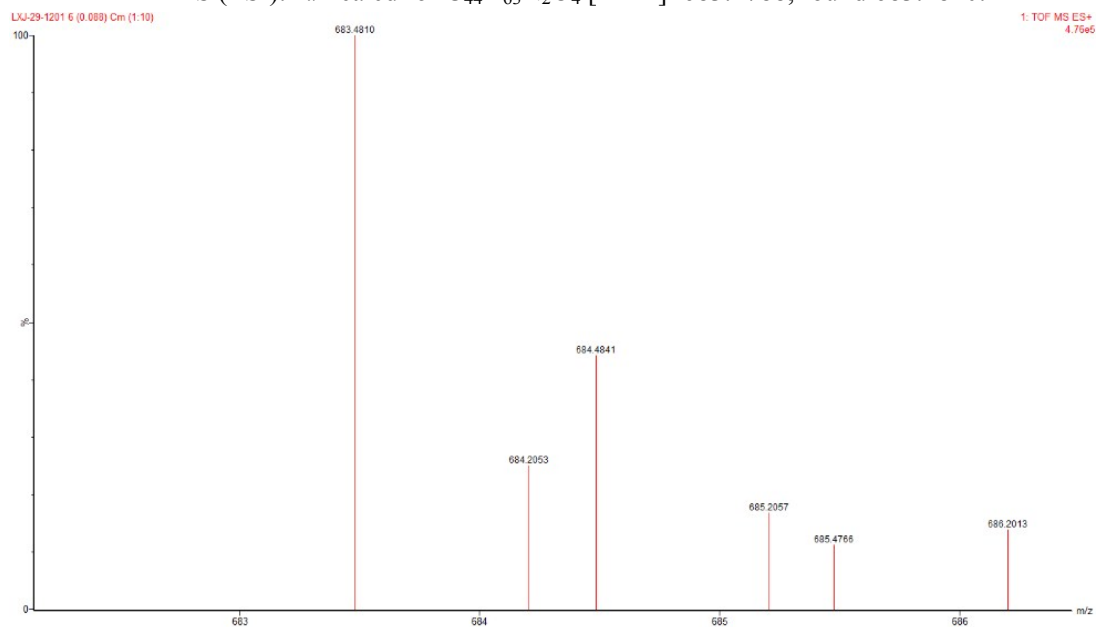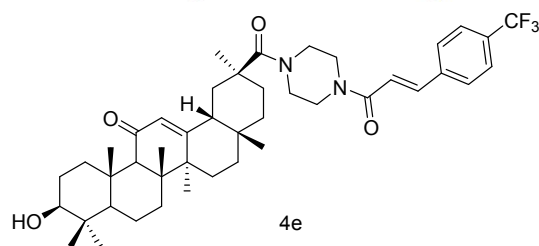

HRMS (ESI):  $m/z$  calcd for  $C_{44}H_{60}F_3N_2O_4$   $[M+H]^+$  737.4505, found 737.4526

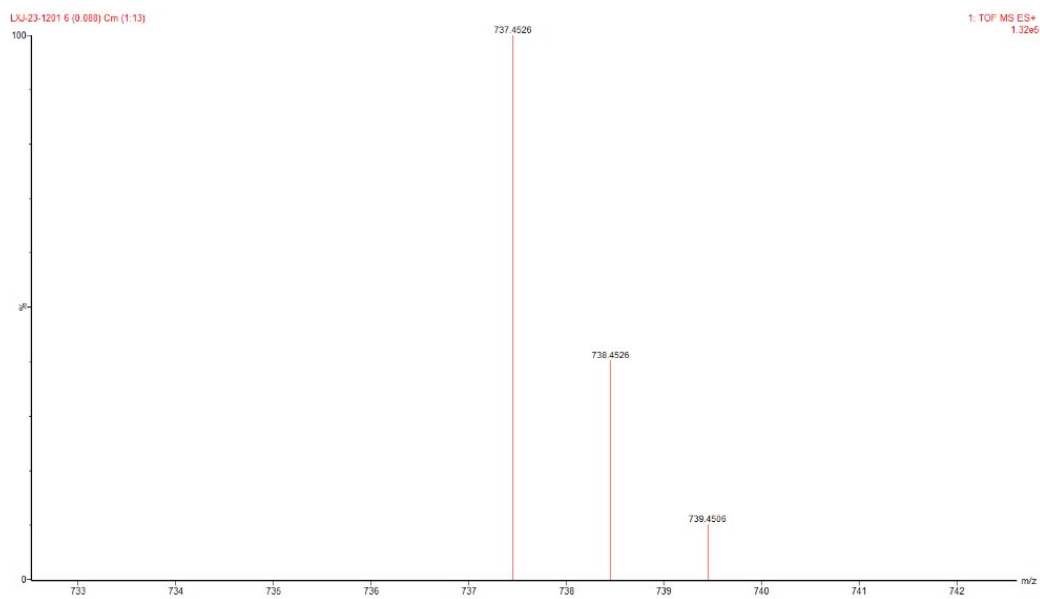



HRMS (ESI):  $m/z$  calcd for  $C_{44}H_{63}N_2O_5$   $[M+H]^+$  699.4737, found 699.4765

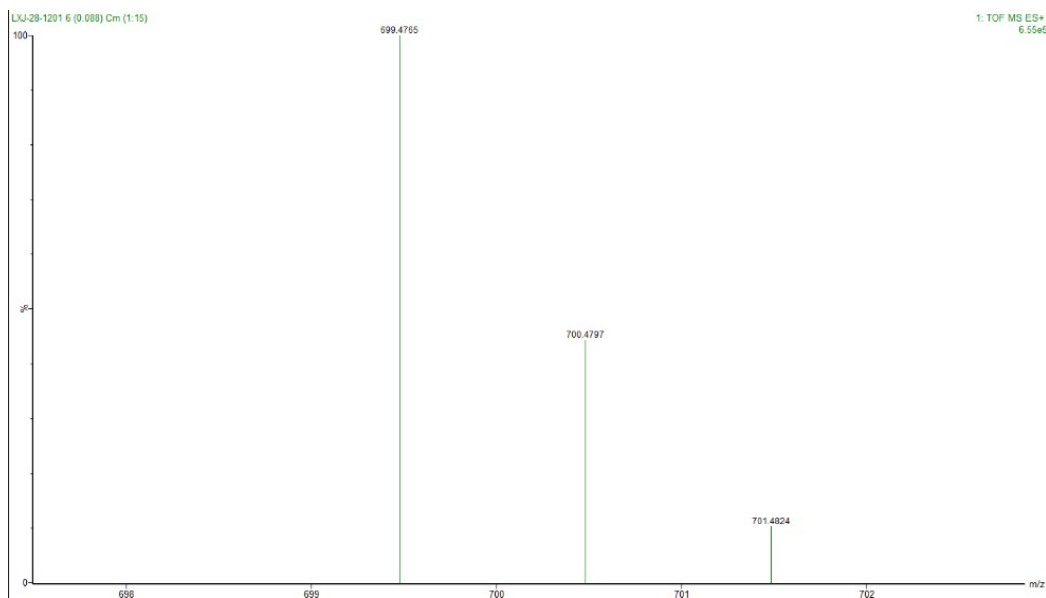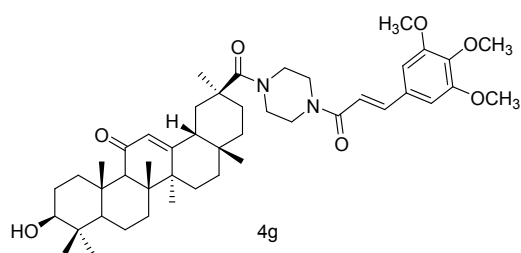

HRMS (ESI):  $m/z$  calcd for  $C_{46}H_{67}N_2O_7$   $[M+H]^+$  759.4948, found 759.4978

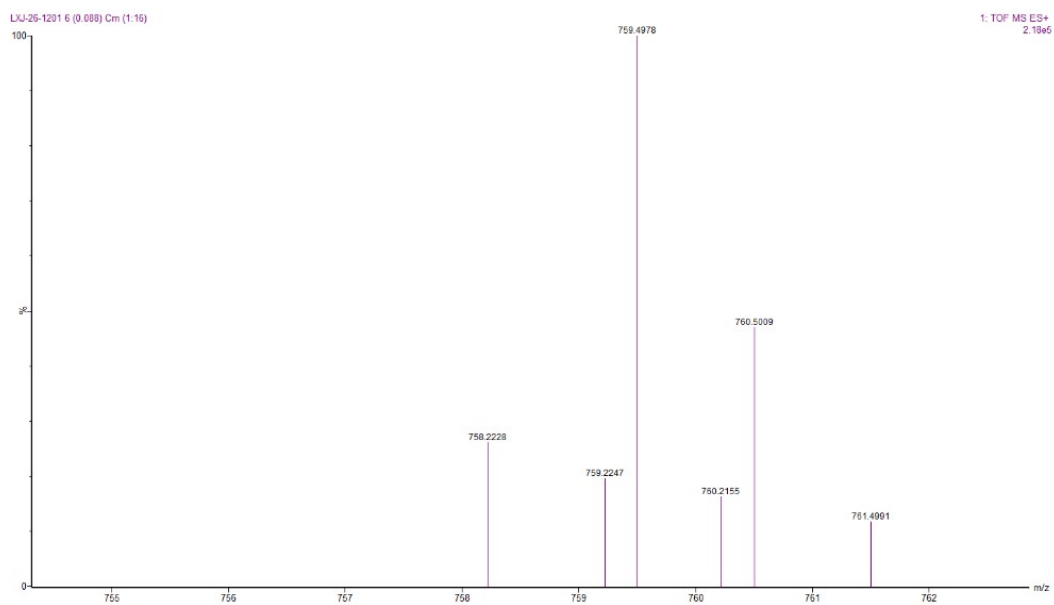



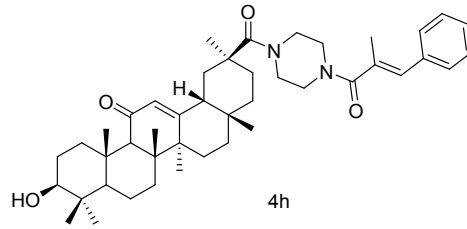

HRMS (ESI):  $m/z$  calcd for  $C_{44}H_{63}N_2O_4$   $[M+H]^+$  683.4788, found 683.4813

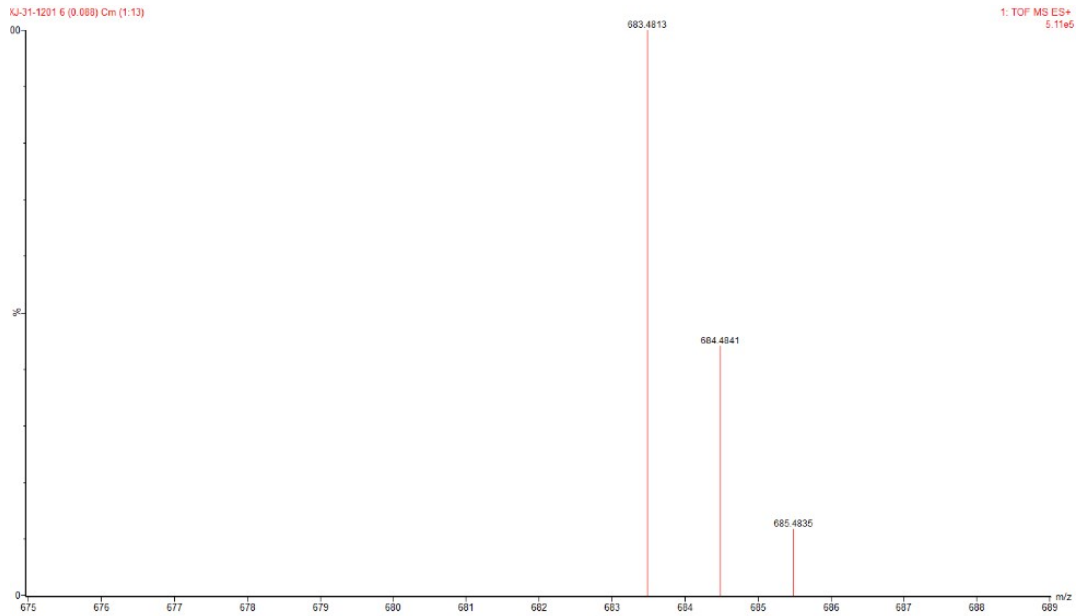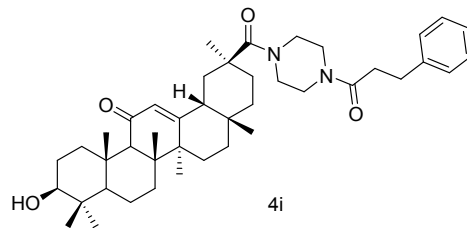

HRMS (ESI):  $m/z$  calcd for  $C_{43}H_{63}N_2O_4$   $[M+H]^+$  671.4788, found 671.4811

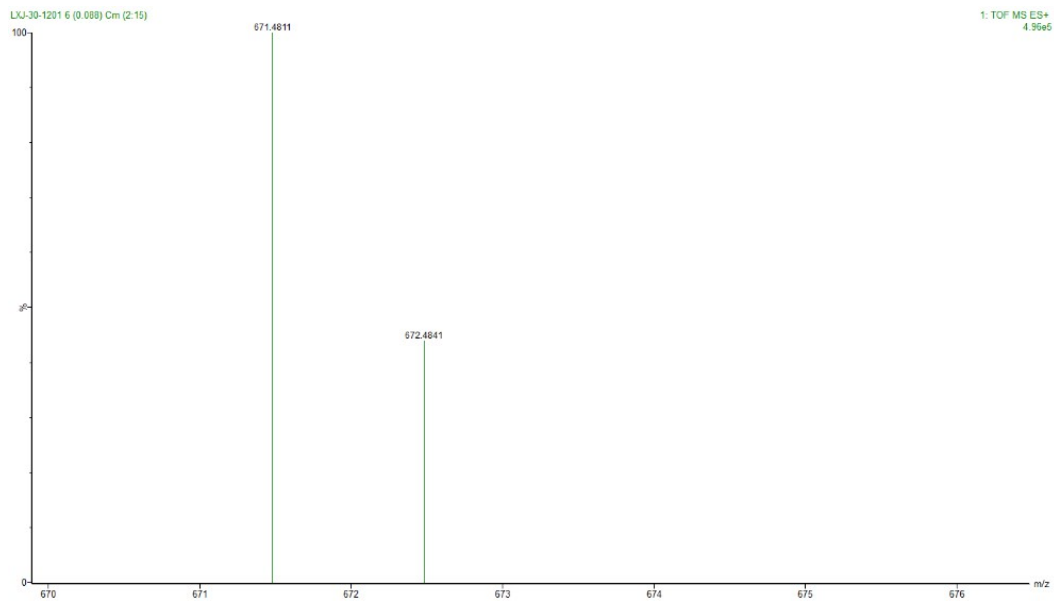



HRMS (ESI):  $m/z$  calcd for  $C_{41}H_{59}N_2O_4$   $[M+H]^+$  643.4475, found 643.4500

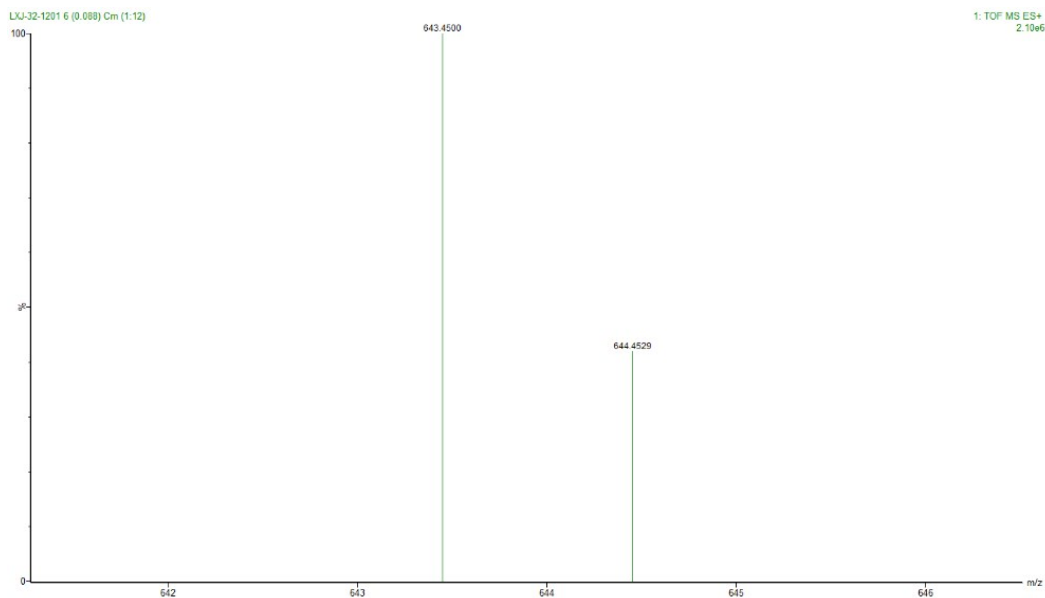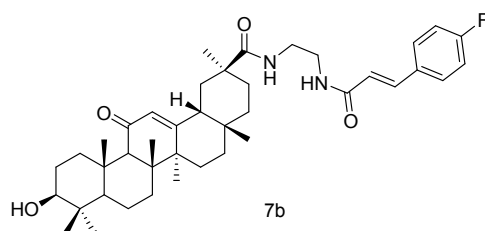

HRMS (ESI):  $m/z$  calcd for  $C_{41}H_{58}FN_2O_4$   $[M+H]^+$  661.4381, found 661.4402

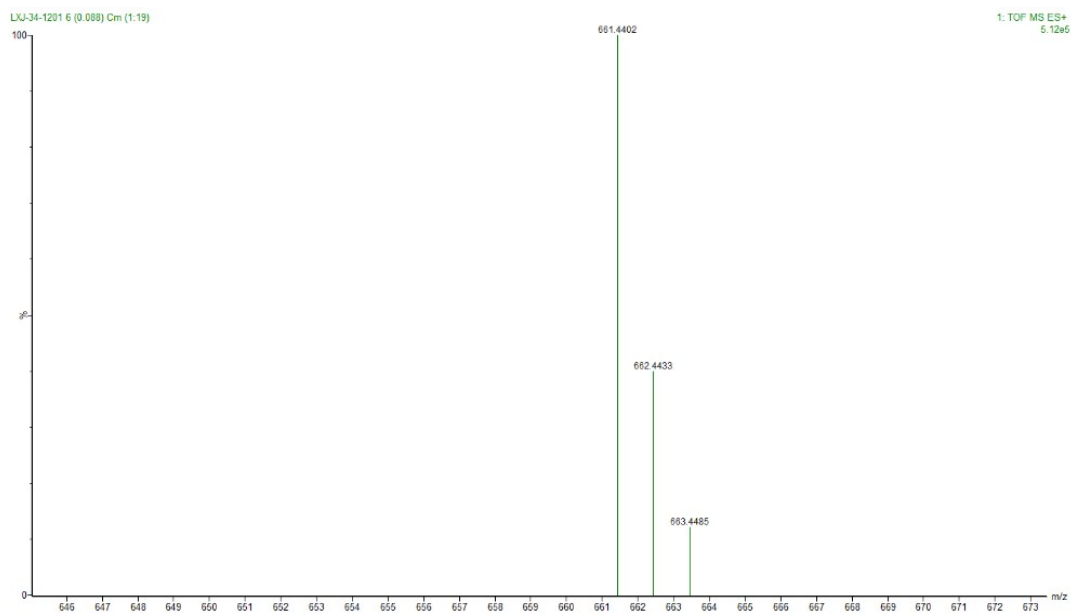

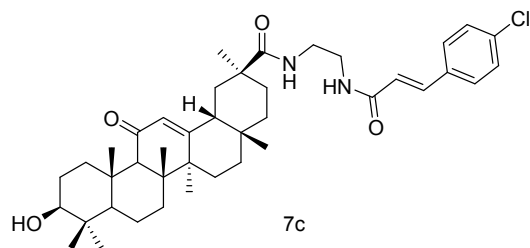

HRMS (ESI):  $m/z$  calcd for  $C_{41}H_{58}ClN_2O_4$   $[M+H]^+$  677.4085, found 677.4112

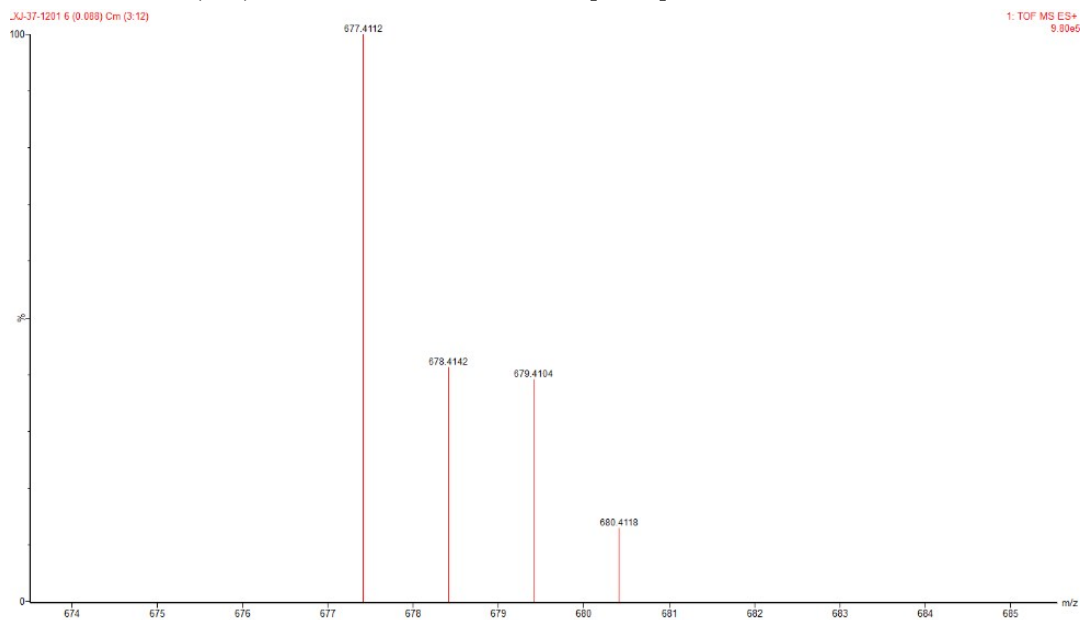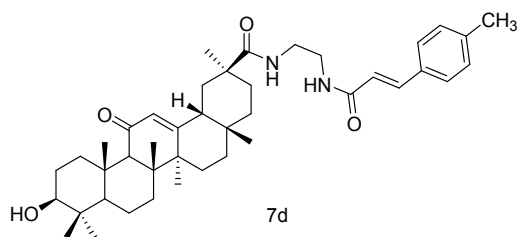

HRMS (ESI):  $m/z$  calcd for  $C_{42}H_{61}N_2O_4$   $[M+H]^+$  657.4631, found 657.4657

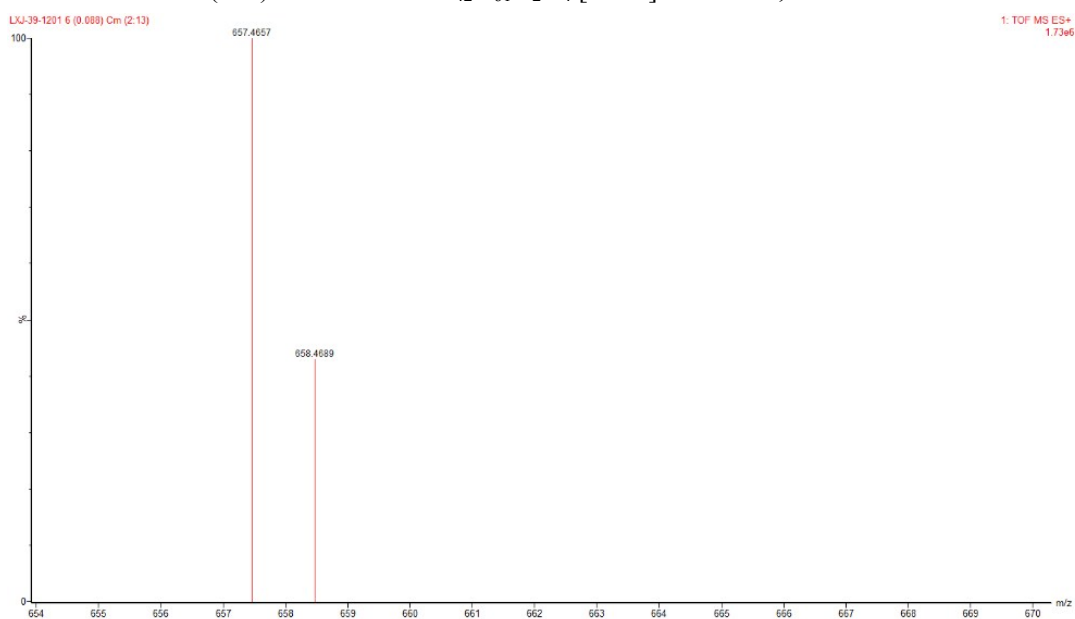

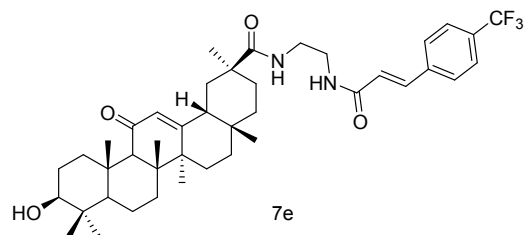

HRMS (ESI):  $m/z$  calcd for  $C_{42}H_{58}F_3N_2O_4$   $[M+H]^+$  711.4349, found 711.4374

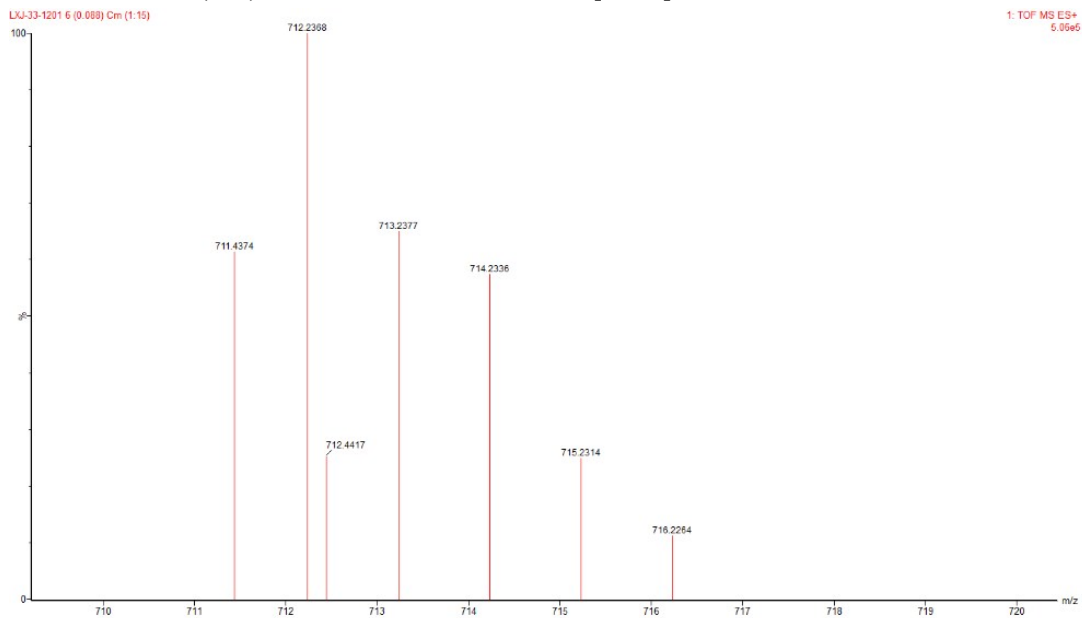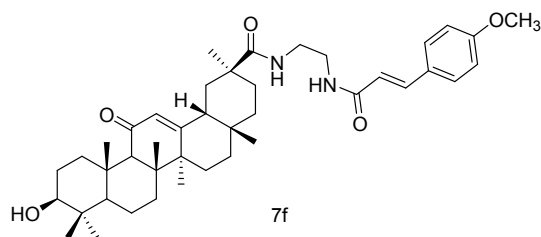

HRMS (ESI):  $m/z$  calcd for  $C_{42}H_{61}N_2O_5$   $[M+H]^+$  673.4580, found 673.4603

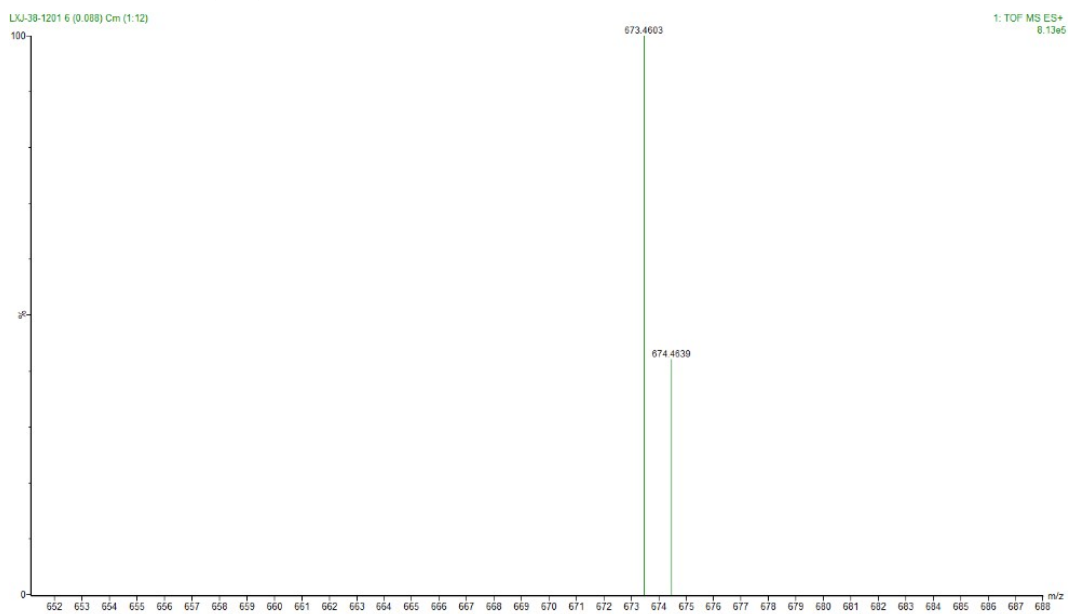

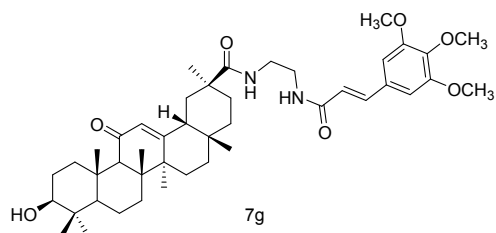

HRMS (ESI):  $m/z$  calcd for  $C_{44}H_{65}N_2O_7$   $[M+H]^+$  733.4792, found 733.4821

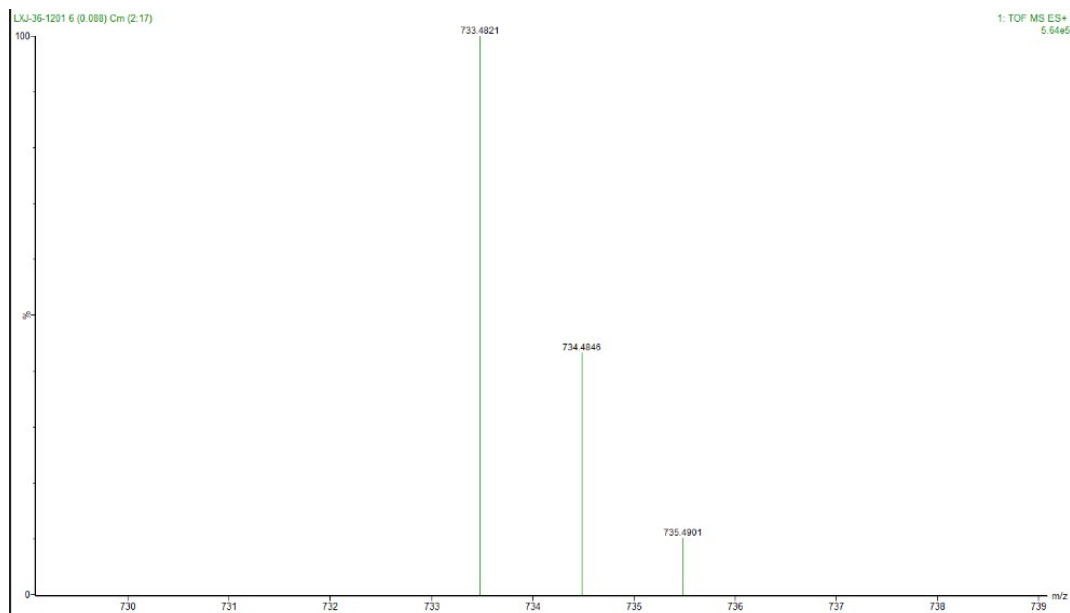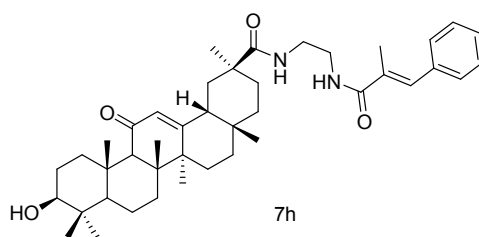

HRMS (ESI):  $m/z$  calcd for  $C_{42}H_{61}N_2O_4$   $[M+H]^+$  657.4631, found 657.4654

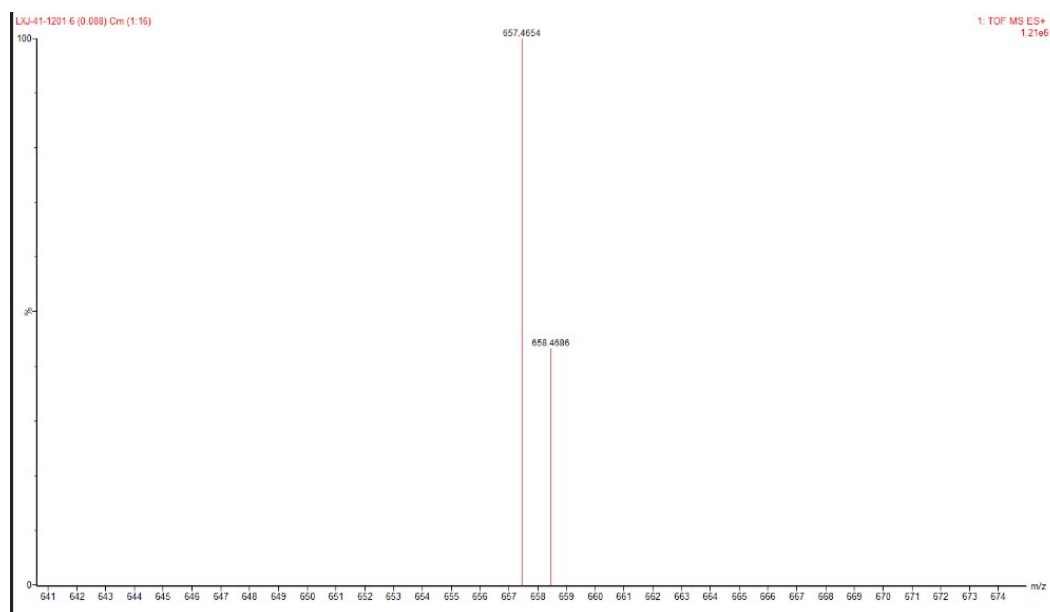

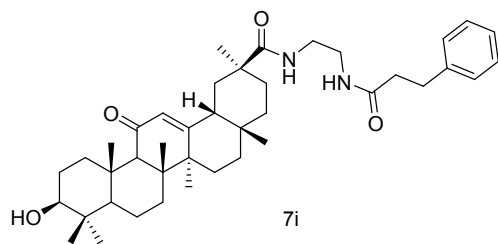

HRMS (ESI):  $m/z$  calcd for  $C_{41}H_{61}N_2O_4$   $[M+H]^+$  645.4631, found 645.4659

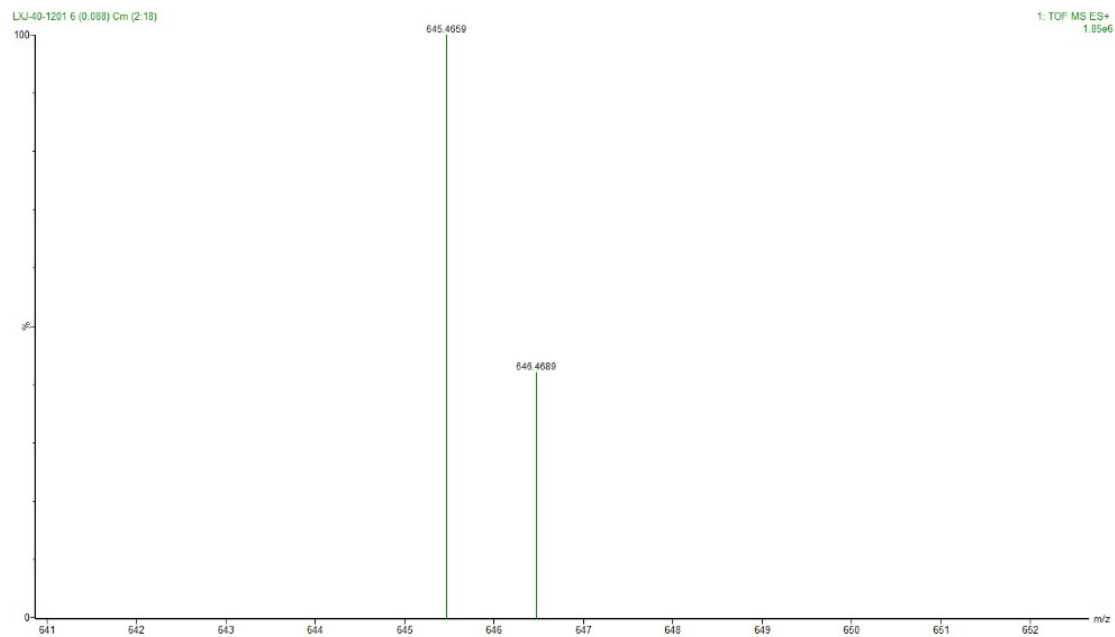

Supplement: RA-009-C9RA04961D-s001.pdf [file RA-009-C9RA04961D-s001.pdf]
